1 Differential expression and novel permeability properties of three  
2 aquaporin 8 paralogs from seawater-challenged Atlantic salmon smolts

3  
4 Morten B. Engelund<sup>1\*</sup>, François Chauvigné<sup>2</sup>, Birgitte Mønster Christensen<sup>3</sup>, Roderick Nigel Finn<sup>4,5</sup>,  
5 Joan Cerdà<sup>2</sup> and Steffen S. Madsen<sup>1</sup>

6  
7 <sup>1</sup>Institute of Biology, University of Southern Denmark, Odense, Denmark

8 <sup>2</sup>Institut de Recerca i Tecnologia Agroalimentàries (IRTA) – Institut de Ciències del Mar, Consejo  
9 Superior de Investigaciones Científicas (CSIC), Barcelona, Spain

10 <sup>3</sup>Department of Biomedicine, Aarhus University, Aarhus, Denmark.

11 <sup>4</sup> Department of Biology, Bergen High Technology Centre, University of Bergen, Bergen, Norway

12 <sup>5</sup> Institute of Marine Research, Nordnes, Bergen, Norway

13

14

15 \* Correspondence:

16 Morten Buch Engelund

17 Institute of Biology

18 University of Southern Denmark

19 Campusvej 55

20 DK-5230 Odense M

21 Denmark

22 [mengelund@biology.sdu.dk](mailto:mengelund@biology.sdu.dk)

23

24 Running title: Aquaporin 8 paralogs in Atlantic salmon

25

26 Key words: aquaporin, evolution, osmoregulation, salmon, intestine, neofunctionalization

27

28 **Abstract**

29 Aquaporins may facilitate transepithelial water absorption in the intestine of seawater (SW)  
30 acclimated fish. Here we have characterized three full-length *aqp8* paralogs from Atlantic salmon  
31 (*Salmo salar*). Bayesian inference revealed that each paralog is a representative of the three major  
32 classes of *aqp8aa*, *aqp8ab* and *aqp8b* genes found in other teleosts. The permeability properties  
33 were studied by heterologous expression in *Xenopus laevis* oocytes, and the expression levels  
34 examined by qPCR, immunofluorescence and immunoelectron microscopy, and immunoblotting of  
35 membrane fractions from intestines of SW challenged smolts. All three Aqp8 paralogs were  
36 permeable to water and urea, whereas Aqp8ab and -8b were, surprisingly, also permeable to  
37 glycerol. The mRNA tissue distribution of each paralog was distinct although some tissues, such as  
38 the intestine showed redundant expression of more than one paralog. Immunofluorescence  
39 microscopy localized Aqp8aa(1+2) to intracellular compartments of the liver and intestine, and  
40 Aqp8ab and Aqp8b to apical plasma membrane domains of the intestinal epithelium, with Aqp8b  
41 also in goblet cells. In a control experiment with rainbow trout, immunoelectron microscopy  
42 confirmed abundant labeling of Aqp8ab and -8b at apical plasma membranes of enterocytes in the  
43 middle intestine and also in subapical vesicular structures. During SW-challenge, Aqp8ab showed  
44 significantly increased levels of protein expression in plasma membrane enriched fractions of the  
45 intestine. These data indicate that the Atlantic salmon Aqp8 paralogs have neofunctionalized on a  
46 transcriptional as well as on a functional level, and that Aqp8ab may play a central role in the  
47 intestinal transcellular uptake of water during SW acclimation.

48 **Introduction**

49 The Atlantic salmon (*Salmo salar*) is a euryhaline teleost with an anadromous life cycle during  
50 which it periodically inhabits freshwater (FW) as well as seawater (SW) environments. The internal  
51 osmolarity is maintained at approximately one third of full strength SW irrespective of the  
52 environment and thus there are strong hyperosmotic gradients with respect to FW (~1mOsm) and  
53 hyposmotic gradients with respect to SW (~1000 mOsm) (Evans et al., 2005). In FW, ions are lost  
54 to the environment by diffusion and are replaced by active absorption in the gill (Evans et al., 2005;  
55 Hwang et al., 2011) and through extraction of solutes from food particles in the intestine  
56 (Buddington and Diamond, 1987; Sundell et al., 2003). Excess water is excreted by the kidney and  
57 valuable solutes and ions are reabsorbed by the proximal and distal segments of the nephron  
58 (Beyenbach, 2004; McDonald, 2007). In SW, fluxes of ions and water are reversed. To compensate  
59 for such water loss, salmon begin drinking shortly after transfer to SW (Smith, 1932; Usher et al.,  
60 1988) and the ingested water is absorbed passively in concert with ions during passage through the  
61 gastrointestinal tract (Ando et al., 2003; Sundell & Sundh, 2012; Wood & Grosell, 2012). Excess  
62 ions are actively excreted over the gill, predominately through transcellular and paracellular routes  
63 in association with ionocytes in the gill filament (Karnaky, 1986; Hiroi et al., 2005; Tipsmark et al.,  
64 2008). Divalent ions are excreted by the kidney and intestine and an overall decrease in glomerular  
65 filtration rate (GFR) occurs in order to conserve water (Brown et al., 1978; 1980). Important water  
66 fluxes also occur in other tissues such as the liver and gall bladder during the formation of bile  
67 (Grosell et al., 2000) or in marine teleost oocytes undergoing meiotic maturation (e.g. Fabra et al.,  
68 2005; 2006; Zapater et al., 2011).

69

70 Recent studies have highlighted an important physiological role of transmembrane water channels  
71 (aquaporins) that transport water and small, noncharged solutes such as urea and glycerol for the  
72 maintenance of fluid homeostasis in fishes exposed to FW or SW environments (reviewed by Cerdà  
73 & Finn, 2010; Sundell & Sundh, 2012). Compared to mammals, however, teleosts have been shown  
74 to encode duplicate copies of most aquaporin orthologs, but up to three copies of the *aqp8* gene,  
75 consistent with both tandem and genomic duplication events early in the evolution of this lineage  
76 (Cerdà & Finn, 2010; Tingaud-Sequeira et al., 2010; Finn & Cerdà, 2011). Within some families of  
77 teleosts such as Salmonidae, yet another genome duplication is known to have occurred (Davidson  
78 et al., 2010; Moghadam et al., 2011), making it a cumbersome task to characterize all existing  
79 paralogs even for one species.

80 To date the piscine aquaporin superfamily has only been characterized in the diploid zebrafish  
81 (*Danio rerio*) (Tingaud-Sequeira et al., 2010), while other species of teleost have been examined  
82 with respect to basal expression patterns of selected aquaporins within osmoregulatory tissues  
83 (Cutler & Cramb, 2002; Lignot et al., 2002; Martinez et al, 2005a,b; Raldúa et al., 2008; Tingaud-  
84 Sequeira et al., 2010, Tipsmark et al. 2010; Madsen et al., 2011). Although there is some consensus  
85 on the expression pattern of each paralog, there is emerging evidence that even closely related  
86 aquaporins, such as the tandemly duplicated *aqp1aa* and *aqp1ab* genes and alternatively duplicated  
87 *aqp8* paralogs, have neofunctionalized in relation to their regulation and function (Martinez et al.,  
88 2005a,b; Tipsmark et al., 2010, Madsen et al., 2011, Finn & Cerdà, 2011; Zapater et al., 2011). In  
89 the stenohaline FW zebrafish, *aqp8* is present as three paralogs (*aqp8aa*, *-8ab* and *-8b*) and  
90 fragments of each have been found in a partial transcriptome (EST library) of the Atlantic salmon  
91 (Tingaud-Sequeira et al., 2010; Cerdà & Finn, 2010; Engelund and Madsen, 2011). In mammals,  
92 such as rats, only one AQP8 is expressed which is found in the proximal kidney tubules,  
93 hepatocytes, testes, salivary gland and intestine (Elkjær et al., 2001). In teleosts, such as the  
94 European eel (*Anguilla anguilla*), Japanese eel (*Anguilla japonica*), zebrafish and Atlantic salmon,  
95 several *aqp8* transcripts have been located in some of the same tissues although each paralog  
96 showed a distinct tissue mRNA expression pattern (Cutler et al., 2009; Kim et al., 2010; Tingaud-  
97 Sequeira et al., 2010; Tipsmark et al., 2010). Due to the extra round of genome duplication in  
98 salmonids, more *aqp8s* may exist in this species than in zebrafish and this study probably does not  
99 reveal the full complement of *aqp8s* in Atlantic salmon. Specifically, an extra *aqp8aa* was  
100 uncovered based on preliminary data from the Atlantic salmon genome during this study. These two  
101 paralogs, *aqp8aa1* and *aqp8aa2* are 92 % identical on a nucleotide level and share 91 % identical  
102 amino acid residues. Once the genome is published, more paralogs might be uncovered contributing  
103 to the evidence of the extra round of genome duplication in salmonids. However, the focus of this  
104 study is representatives of the three main types of *aqp8*, which are known from the comprehensive  
105 studies on zebrafish (Tingaud-Sequeira et al., 2010; Cerda & Finn, 2010) in order to uncover if  
106 neofunctionalization of these paralogs were important for regulation of water balance.

107

108 During SW acclimation, Atlantic salmon *aqp8ab* mRNA is strongly upregulated in intestinal  
109 segments indicating a possible role for this paralog in water balance (Tipsmark et al 2010). Similar  
110 results were found for European and Japanese eels, where SW acclimated animals showed higher  
111 levels of *aqp8* mRNA in the intestine (Cutler et al., 2009; Kim et al., 2010). The involvement of

112 Aqp8 in the SW acclimation of Atlantic salmon was further supported by recent work in our  
113 laboratory where a homologous antibody detected Aqp8ab in the brush borders and lateral  
114 membranes of enterocytes (Madsen et al., 2011).

115

116 In the present study, we set out to expand the knowledge of Aqp8 biology in Atlantic salmon by  
117 investigating the tissue distribution of *aqp8* mRNAs and determine the cellular locations of  
118 Aqp8aa(1+2), -8ab and -8b proteins using homologous antibodies. We additionally examined the  
119 protein expression of Aqp8ab and Aqp8b in two intestinal segments to establish whether the  
120 suggested role of Aqp8ab during SW acclimation (Tipsmark et al., 2010) could be confirmed at the  
121 protein level and if differences existed between the paralogs. The permeability properties of the  
122 three paralogs were investigated in *X. laevis* oocytes in order to reveal potential  
123 neofunctionalization, which could shed light on whether tissue specific expression patterns are  
124 linked to functional diversity.

125

## 126 **Materials and methods**

### 127 *Animals*

128 Atlantic salmon psmolts were obtained from the Danish Centre for Wild Salmon (Randers,  
129 Denmark). The fish spent the spring in outdoor tanks under natural light and temperature conditions  
130 and were moved to the university campus in June 2010 to an indoor aquarium with biofiltered  
131 recirculated freshwater where a photoperiod of 12h: light 12h: dark and a constant temperature of  
132 14°C was upheld. In September 2010, a group of fish was moved to a tank containing artificial 25  
133 ppt seawater (Red sea salt, Eliat, Israel) where they remained for at least three weeks prior to  
134 sampling. The fish were fed *ad libitum* using commercial fish pellets and food was generally  
135 withheld 3 days before an experiment. Fish were anesthetized with 0.2 ppt phenoxy ethanol and  
136 euthanized by cutting the spinal cord and pithing the brain before samples for RNA analysis and  
137 histology were taken. Long term SW- or FW-acclimated salmon were then used for the tissue  
138 screening of *aqp8* transcripts while intestine and liver from SW acclimated salmon were used for  
139 immunofluorescence microscopy. Middle intestine from long term SW acclimated rainbow trout  
140 (*Oncorhynchus mykiss*), (~ 40g) obtained from Lihme Dambrug, (Randbøl, Denmark) was used for  
141 immunoelectron microscopy. All experimental procedures were approved by the Danish Animal  
142 Experiments Inspectorate in accordance with the European convention for the protection of  
143 vertebrate animals used for experiments and other scientific purposes (#86/609/EØF).

144

145 *Seawater acclimation experiment*

146 In late April 2012, one year-old smolts (20 – 30 g, N=100) were transferred to a tank containing 25  
147 ppt SW at the Danish Centre for Wild Salmon and ten fish were anesthetized and sampled as  
148 described above following 6 hrs, 24 hrs, 72 hrs and 168 hrs in SW. At the same time, a control  
149 group of smolts (N=100) were sham-transferred to a tank containing FW and sampled accordingly.  
150 Ten smolts were sampled prior to sham or SW transfer to represent time point 0 hrs.

151

152 *Cloning of Atlantic salmon aquaporins aqp8aa1, aqp8ab and aqp8b*

153 Full-length sequences of Atlantic salmon *aqp8* mRNAs were cloned using RNA from the middle  
154 intestine for *aqp8ab* and *aqp8b* and from the liver for *aqp8aa1*. RNA was purified using TRIsure™  
155 (DNA Technology, Risskov, Denmark) according to the manufacturer's instructions. cDNA  
156 synthesis was performed with an oligo dT<sub>(15)</sub> primer using DyNAmo™ cDNA synthesis kit  
157 (Thermo Scientific, Søborg, Denmark) according to the manufacturer's instructions. The full  
158 mRNA sequence for *aqp8ab* and *aqp8b* was readily available from the EST database for Atlantic  
159 salmon at [www.ncbi.nlm.nih.gov](http://www.ncbi.nlm.nih.gov) based on previous annotations (See legend, Table 1) (Cerdà and  
160 Finn, 2010; Tipsmark et al., 2010). The full *aqp8ab* cDNA was amplified in one PCR reaction  
161 using the cloning primers stated in Table 1. PCR conditions were an initial denaturing for 3 min at  
162 94°C followed by 35 cycles of 94°C for 45 sec, 59°C for 45 sec and 72°C for 1 min ending with a  
163 final elongation at 72°C for 12 min. Cloning primers included restriction enzyme sequences for Bgl  
164 II and Eco RV in the 5' and 3' end respectively. The *aqp8b* cDNA was obtained using a nested PCR  
165 design. First, 35 cycles of PCR as explained above was performed with primers aligning outside the  
166 coding sequence (Table 1). This was followed by 15 cycles of PCR using cloning primers (Table 1)  
167 with a slight increase in annealing temperature of the PCR reaction to 61°C. The *aqp8aa1* cDNA  
168 was obtained by PCR using primers aligning to the 3'UTR of rainbow trout (*Oncorhynchus mykiss*)  
169 *aqp8aa* and the 5'UTR of the Atlantic salmon *aqp8aa1*. After the initial PCR reaction using these  
170 primers another PCR reaction was performed for 35 cycles using cloning primers (Table 1).  
171 Annealing temperature was 61°C and the other parameters of the PCR reaction were the same as  
172 described above. The transcripts were ligated into the pT7Ts oocyte expression vector, which was  
173 then used as a template for *in vitro* transcription (see below). Each paralog was sequenced in both  
174 directions to ensure a complete cDNA.

175

176 *Phylogenetic analysis*

177 Deduced amino acid sequences of the isolated Atlantic salmon mRNAs were aligned with other  
178 teleost Aqp8 orthologs retrieved from public databases (Ensembl v70 and GenBank) using the  
179 MAFFT (v7.017b) and T-Coffee (9.03.r1318) software packages (Notredame et al., 2000; Katoh &  
180 Toh, 2008). Amino acid alignments were converted to codon alignments using Pal2Nal (Suyama et  
181 al., 2006) and molecular phylogenies inferred using Bayesian (Mr Bayes v3.2.0; 5 million  
182 generations; Ronquist & Huelsenbeck, 2003) and maximum likelihood (PAUP v4b10-x86-macosx;  
183 Swafford, 2002) protocols as described previously (Zapater et al., 2011, 2013).

184

185 *Water permeability of X. laevis oocyte expressing salmon aquaporin 8's*

186 Atlantic salmon *aqp8* cDNAs were cloned into the *EcoRV/BglII* sites of the oocyte expression  
187 vector pT7Ts (Deen et al. 1994). The cRNAs were synthesized as described (Deen et al. 1994) and  
188 microinjected into *X. laevis* stage V–VI oocytes. Oocytes were maintained in 200 mOsm modified  
189 Barts Solution (MBS, in mmol L<sup>-1</sup> 0.33 Ca(NO<sub>3</sub>)<sub>2</sub>, 0.4 CaCl<sub>2</sub>, 88 NaCl, 1 KCl, 2.4 NaHCO<sub>3</sub>, 0.82  
190 MgSO<sub>4</sub>, 10 4-(2-hydroxyethyl)-1-piperazine-ethanesulfonic acid (HEPES) pH 7.5) and were  
191 injected with 50 nl of water containing 1-10 ng cRNA of one of the three salmon aquaporin 8  
192 paralogs. Control oocytes were not injected since injection does not affect the water permeability of  
193 oocytes (data not shown). After 24 hours, the oocytes were manually defolliculated and following  
194 another 24 hours, the water permeability of the oocytes was determined by measuring the time-  
195 course changes in the relative volume of the oocytes when incubated in 10 fold diluted MBS. The  
196 volume of the oocyte was determined by recording the maximal surface area of the oocyte every 2  
197 seconds using time lapse microscopy. Assuming that the oocyte is a perfect sphere, the relative  
198 volume change can then be calculated from the obtained surface area. The osmotic water

199 permeability ( $P_f$ ) was determined according to the following equation: 
$$P_f = \frac{V_0 \left[ \frac{d(V/V_0)}{dt} \right]}{S \cdot V_w (Osm_{in} - Osm_{out})}$$

200 Where  $\left[ \frac{d(V/V_0)}{dt} \right]$  is the relative volume change of the oocyte with time incubated in the diluted

201 media, S is the surface area of the oocyte and  $V_w$  is the molar volume of water (18 cm<sup>3</sup>). Inhibition  
202 of water transport by mercury was investigated by incubating oocytes in MBS containing 0.1 mM  
203 HgCl<sub>2</sub> for 15 min prior to measurement. Recovery of water transport was measured by transferring  
204 HgCl<sub>2</sub> incubated oocytes through two washes with clean MBS to a solution of MBS with 5 mM  
205 mercaptoethanol for 15 min prior to measurement.



206

207 *Urea and glycerol uptake of X. laevis oocytes expressing salmon aqp8's*

208 Oocytes were injected with 50 nl of water or water containing 15ng cRNA of a salmon *aqp8*  
209 paralog. Groups of 10 oocytes were incubated in 200  $\mu$ l of MBS containing 20  $\mu$ Ci of  
210 [1,2,3-<sup>3</sup>H]glycerol (50 Ci/mmol) or [<sup>14</sup>C]urea (58 mCi/mmol) at room temperature. Cold solute was  
211 added to give 1 mM final concentration. After 10 min, which included zero time for subtraction of  
212 the signal from externally bound solute, oocytes were washed rapidly in ice-cold MBS three times,  
213 and individual oocytes were then dissolved in 5% Sodium-dodecyl-sulfate (SDS) for scintillation  
214 counting.

215

216 *Tissue screening of salmon aquaporin 8 paralogs*

217 Expression of salmon aquaporin mRNA in various tissues has previously been reported for *aqp8aa*  
218 and *aqp8ab* (Tipsmark et al., 2010) but was repeated in the current experiment for comparison with  
219 *aqp8b*. Total RNA was extracted from 14 different tissues of four Atlantic salmon as explained  
220 above. The RNA was subjected to DNase treatment with RQ1 RNase-Free DNase (Promega  
221 Biotech AB, Stockholm, Sweden) according to manufacturer's protocol. Synthesis of cDNA took  
222 place with the use of the High Capacity cDNA Reverse Transcription Kit (Applied Biosystems,  
223 Carlsbad, CA, USA). Real time quantitative PCR (qPCR) was performed on a Mx3000p instrument  
224 (Stratagene, La Jolla, CA, USA) using the primers stated in Table 1. Primers for *aqp8aa* and  
225 *aqp8ab* were the same as reported in Tipsmark et al (2010) and primers for *aqp8b* were designed  
226 using Primer 3 software (Rozen and Skaletsky, 2000). Preliminary data from the Atlantic salmon  
227 genome became available during the publication process of this study and showed that two *aqp8aa*  
228 paralogs (*aqp8aa1* and *aqp8aa2*) exist and the primers designed for qPCR are unable to distinguish  
229 between these two paralogs as they are 92 % identical in the coding sequence. Results for this  
230 paralog are therefore named *aqp8aa(1+2)*. BlastN of each primer pair against the cloned sequence  
231 of each paralog showed no similarity other than against the paralog for which the primers were  
232 designed. For each paralog, the PCR product was validated by agarose gel electrophoresis and  
233 melting curve analysis. A two-step standard qPCR reaction (95°C for 30 sec and 60°C for 1min for  
234 40 cycles) was performed using SYBR Green Jumpstart Taq Readymix (Sigma-Aldrich, St. Louis,  
235 MO, USA). Total reaction volume was 25 $\mu$ l and primers were used at a concentration of 150 nM.  
236 The relative expression of the *aqp8* paralogs was normalized to the expression of elongation factor  
237 1a (*ef1a*) according to Olsvik et al. (2005). Efficiency of amplification ( $E_a$ ) for each set of primers



238 was calculated by standard curve analysis of increasing diluted solutions of cDNA according to  
239 Pfaffl (2001). Normalized expression of each paralog was then calculated as:

$$240 \quad C_n = \left(1 + E_{a(\text{target})}\right)^{-Ct(\text{target})} / \left(1 + E_{a(\text{EF1a})}\right)^{-Ct(\text{EF1a})}$$

241 Where Ct is the threshold cycle and Cn is the relative copy number of the target gene.

242

### 243 *Primary antibodies*

244 The homologous polyclonal antibodies used in this study were raised in rabbits by BioGenes,  
245 (Berlin, Germany). A synthetic peptide corresponding to a N-terminal epitope (Aqp8aa1:  
246 CFTVAGADTGDSGPG-amide; Aqp8ab: CGHSTLMSGTKKPTP-amide; Aqp8b:  
247 CMASDSKKAPVKPPN-amide) for each paralog was used to immunize the rabbits and the  
248 collected antisera was affinity purified against the antigenic peptide by BioGenes (Aqp8ab, Madsen  
249 et al., 2011) or by use of the SulfoLink<sup>(R)</sup> Immobilization Kit for Peptides (Aqp8aa1 and Aqp8b,  
250 current study) (Thermo Scientific, Waltham, MA, USA) according to the manufacturer's  
251 instructions. For immunofluorescence and immunoelectron microscopy, serum was used. Cross  
252 reactivity of each antibody toward the other paralogs was minimal as shown by incubation of each  
253 antibody against a crude membrane fraction from *X. laevis* oocytes expressing each of the three  
254 paralogs (Fig.2C). The antibody developed against Aqp8aa1 shares 12 out of 15 amino acids with  
255 the preliminary Aqp8aa2 sequence, so the antibody may very well bind to both proteins.  
256 Preadsorption of the antibodies with up to 100 fold molar excess of the respective antigenic peptide  
257 abolished binding of the antibody to Western blots of oocyte membrane fractions expressing each  
258 aquaporin or homogenates from pyloric caeca or liver (data not shown, Aqp8ab antibody validated  
259 in Madsen et al. (2011)).

260

### 261 *Immunoblotting of oocytes and tissues*

262 Total membrane fractions from *X. laevis* oocytes injected with 15 ng of *aqp8aa1*, *aqp8ab* or *aqp8b*  
263 cRNA were prepared according to Kamsteeg & Deen (2001). Ten oocytes, frozen in liquid N<sub>2</sub>, were  
264 homogenized in HbA buffer (in mmol L<sup>-1</sup> 20 Tris-HCl (pH 7.4), 5 MgCl<sub>2</sub>, 5 NaH<sub>2</sub>PO<sub>4</sub>, 1  
265 ethylenediaminetetraacetic acid (EDTA), 80 Sucrose and 1% v/v of a protease inhibitor cocktail  
266 (P8340, Sigma-Aldrich)) using a P200 pipette and subsequently centrifuged for 5 min at 200 x g at  
267 4°C. The supernatant from this step was centrifuged again under the same conditions and the  
268 resulting supernatant was centrifuged for 20 min at 20,000 x g to pellet a total membrane

269 preparation. The pellet was resuspended in 1x NuPAGE LDS sample buffer (Invitrogen, Carlsbad,  
270 CA, USA) in a volume of 0.33 oocyte/ $\mu$ l.  
271 Liver or intestinal tissue were homogenized in SEI buffer pH 7.3 (in mmol L<sup>-1</sup> 300 sucrose, 20  
272 Na<sub>2</sub>EDTA, 50 imidazole, 1% v/v of a protease inhibitor cocktail (P8340, Sigma-Aldrich)) with a  
273 tight fitting glass mortar and pestle, followed by centrifugation at 2000 x g for 10 min at 4°C. The  
274 supernatant was then recentrifuged for 30 min at 50.000 x g to pellet an enriched plasma membrane  
275 fraction. The pellet was resuspended in 1x NuPAGE LDS sample buffer in a concentration of 5  
276  $\mu$ g/ $\mu$ l. SDS PAGE and electro-blotting was performed using the NuPAGE system (Invitrogen)  
277 according to the manufacturer's instructions. 50  $\mu$ g of liver or intestinal protein or 3.3 oocytes was  
278 loaded per lane and separated by 200 V for 35 min using a 2-(N-morpholino)ethanesulfonic acid  
279 (MES) running buffer (Invitrogen). Proteins were then blotted onto a nitrocellulose or PVDF  
280 membrane using a tris-glycine transfer buffer (in mmol L<sup>-1</sup> 7.5 Tris, 60 glycine 20% v/v methanol)  
281 for two hours at a constant 25 V. Membranes were blocked for one hour at room temperature in 2%  
282 bovine serum albumin (BSA) in tris-buffered saline containing Tween 20 (TBS-T; in mmol L<sup>-1</sup> 20  
283 Tris, 140 NaCl, 1% Tween 20). Primary antibodies (Rabbit IgG anti Aqp8aa1, Aqp8ab or Aqp8b,  
284 (all 2.5 $\mu$ g/ml)) and mouse anti  $\beta$ -actin (0.25  $\mu$ g/ml, Abcam, Cambridge, UK) were diluted in TBS-T  
285 containing 2 % BSA and incubated overnight at 4°C. Membranes were washed four times 5 min in  
286 TBS-T and incubated in TBS-T and 2% BSA with goat-anti rabbit and goat-anti mouse IgG  
287 secondary antibodies conjugated to the fluorophores Cy5 and Cy3 respectively (Invitrogen) for 1 hr  
288 at room temperature. The membrane was then washed four more times in TBS-T and allowed to dry  
289 overnight before being scanned with a Typhoon Trio Variable mode Imager (GE Healthcare, Little  
290 Chalfont, UK). Relative measurements of protein abundance were performed with the ImageJ gel  
291 analyzer tool (<http://rsbweb.nih.gov/ij/docs/menus/analyze.html#gels>) and  $\beta$ -actin was used for  
292 normalization of protein abundance.

293

#### 294 *Immunofluorescence of oocytes and tissue sections*

295 Tissues were dissected out of the SW acclimated fish and immediately fixed in 4%  
296 paraformaldehyde (4% PFA, 0.9% NaCl, 5 mmol L<sup>-1</sup> NaH<sub>2</sub>PO<sub>4</sub>, pH 7.4) overnight at 4°C. They  
297 were then washed repeatedly in 70% EtOH before being transferred through increasing  
298 concentrations of EtOH to xylene and embedded in paraffin blocks. Five  $\mu$ m thick tissue sections  
299 were cut and heated at 55°C (oocytes at 37°C overnight) for two hours before being hydrated  
300 through decreasing concentrations of EtOH. Tissue sections were demasked by boiling in Tris

301 EDTA buffer (in mmol L<sup>-1</sup> 10 Tris, 1 EDTA, 0.05% Tween-20) for 10 minutes and left to cool for  
302 30 min at room temperature. Oocytes did not undergo antigen retrieval. After one wash in PBS (in  
303 mmol L<sup>-1</sup> 137 NaCl, 2.7 KCl, 1.5 KH<sub>2</sub>PO<sub>4</sub>, 4.3 Na<sub>2</sub>HPO<sub>4</sub>, pH 7.3), sections were blocked for 30 min  
304 in PBS-T (PBS, 0.05% Tween-20) containing 5 % normal goat serum and 0.1 % BSA. They were  
305 then incubated overnight at 4°C with a cocktail of primary antibodies against one of the salmon  
306 Aqp8 paralogs (Rabbit IgG 1-5µg/ml) and against the alpha subunit of the Na<sup>+</sup>, K<sup>+</sup> ATPase (mouse  
307 IgG α5 0.5µg/ml; The Developmental Studies Hybridoma Bank developed under auspices of the  
308 National Institute of Child Health Development and maintained by The University of Iowa,  
309 Department of Biological Sciences, Iowa City, IA, USA). After four washes in PBS-T, sections  
310 were incubated for 1 hr at room temperature with secondary antibodies (4 µg/ml) goat anti mouse  
311 IgG Alexa Fluor<sup>(R)</sup> 568 and goat anti rabbit IgG Oregon Green<sup>(R)</sup> 488 (Invitrogen). Sections were  
312 washed four times in PBS-T and in some cases after the second wash incubated for 5 min with 0.1  
313 µg/ml of 4', 6-diamidino-2-phenylindole (DAPI) in PBS to stain the nuclei of the cells. Sections  
314 were then washed twice in PBS-T followed by a wash in dH<sub>2</sub>O before being allowed to dry. Cover  
315 slips were mounted on the slides with ProLong Gold antifade reagent (Invitrogen). Stained tissues  
316 were inspected with a Leica HC microscope (Leica Microsystems A/S, Ballerup, Denmark) and  
317 representative pictures were obtained with a Leica DC200 camera. Confocal microscopy was  
318 performed with a Zeiss LSM510 META confocal microscope (Carl Zeiss Inc.).

319  
320

### 321 *Immunoelectron microscopy*

322 Intestinal samples were isolated from three rainbow trouts and fixed in 4% neutral buffered PFA  
323 overnight at 4°C. Tissue blocks of the middle intestine were dissected from the remaining intestine  
324 and infiltrated for 2 hr with 2.3 M sucrose in 10 mM PBS, mounted on holders and rapidly frozen in  
325 liquid nitrogen. Ultrathin cryosections (80 nm) were cut on an ultra-cryomicrotome (Reichert  
326 Ultracut S, Leica, Microsystems, Vienna, Austria) and pre-incubated in 10 mM PBS with 0.1%  
327 skimmed milk powder and 50 mM glycine. The sections were incubated overnight at 4° C with  
328 Aqp8ab or Aqp8b serum diluted in 10 mM PBS containing 0.1% skimmed milk powder. The  
329 primary antibodies were visualized by incubation for 1 hr at room temperature with secondary goat  
330 anti-rabbit IgG conjugated to 10 nm colloidal gold particles (GAR.EM10, Bio-Cell Research  
331 Laboratories, Cardiff, UK; dilution: 1:50) diluted in PBS with 0.1% skimmed milk powder, 0.06%

332 polyethyleneglycol and 1% fish gelatin. Electron micrographs were taken on a Morgagni 268D FEI  
333 electron microscope (FEI, the Netherlands).

334

### 335 *Statistics*

336 All statistical comparisons were performed using GraphPad Prism v5.02 (GraphPad Software, La  
337 Jolla, CA, USA). Data were analyzed via one-way or two-way ANOVA where appropriate followed  
338 by Tukey's (one way ANOVA) or Bonferroni's (two way ANOVA) multiple comparisons *post hoc*  
339 test if they showed a Gaussian distribution. If transformation of the data did not result in a Gaussian  
340 distribution, a non parametric Kruskal-Wallis test was performed with a Dunn's *post hoc* test to  
341 compare between data sets. Data were adjusted for outliers using Grubbs' test. Values are reported  
342 as means  $\pm$  SEM.

343

## 344 **Results**

### 345 *Cloning and phylogeny of Atlantic salmon aqp8 paralogs*

346 Three full-length cDNAs ranging in length from 798 – 858 bp were isolated from intestinal and  
347 hepatic tissues of Atlantic salmon. Each cDNA contained open reading frames (ORFs) of 780 or  
348 798 bp, and encoded proteins of 259 or 265 amino acids, respectively. Alignment of the deduced  
349 amino acids and Bayesian inference of the codons and proteins in relation to other teleost *aqp8*  
350 orthologs revealed that each Atlantic salmon paralog clustered as one of the three major classes of  
351 *aqp8* found in zebrafish (Fig. 1; See supplementary Table S1 for accession numbers). Within each  
352 subcluster, however, the topology of transcripts and proteins closely reflected the expected  
353 phylogenetic rank, where the Atlantic salmon sequences clustered together with other salmonids.  
354 These data revealed that two *aqp8aa* genes appear to exist in Atlantic salmon which are 92 %  
355 identical based on preliminary data from the salmon genome for *aqp8aa2*. The longest sequence  
356 was *aqp8aa1* (Acc# KC626878), which encoded the 265 amino acid protein with an estimated  
357 molecular mass of 27.1 kDa, while the two shorter ORFs encoded the Aqp8ab (Acc# KC626879)  
358 and Aqp8b (Acc# KC626880) proteins with estimated molecular masses of 27.5 and 27.3 kDa,  
359 respectively. Maximum likelihood analyses of the codon alignment confirmed the topology  
360 determined via Bayesian inference (data not shown). Comparison of the three Atlantic salmon and  
361 zebrafish Aqp8 orthologs showed high rates of amino acid substitution (37 - 39%) for the Aqp8aa1  
362 and Aqp8b proteins, but only 25% for the Aqp8ab proteins. As noted previously for zebrafish (Finn  
363 & Cerdà, 2011), each Atlantic salmon paralog retains a long N-terminus, a short C-terminus and the

364 six transmembrane-spanning domains that are typical of the aquaporin superfamily. In contrast to  
365 the Aqp8aa1 paralog, which encodes a canonical NPA motif on hemihelix 3, the Aqp8ab and  
366 Aqp8b paralogs harbor non-canonical NPP motifs in this position. Inspection of other teleost  
367 Aqp8ab orthologs revealed that each retained the NPP motif on hemihelix 3, while the Aqp8b  
368 orthologs were more variable with either a Pro in the third position as found in Atlantic salmon, a  
369 Thr in flatfishes such as Atlantic halibut (*Hippoglossus hippoglossus*) and European flounder  
370 (*Platichthys flesus*), or a Ser as found in zebrafish.

371

### 372 *Functional characterization of salmon aquaporin 8 paralogs*

373 Immunofluorescence microscopy, and western blotting of membrane fractions of *X. laevis* oocytes  
374 expressing the salmon Aqp8s showed that all three paralogs were translated and translocated to the  
375 oocyte plasma membrane and thus able to regulate the permeability of the oocyte (Fig. 2A,C).  
376 Accordingly, oocytes expressing Aqp8aa1, -8ab and -8b showed a ~30-, ~19- and ~17-fold increase  
377 in Pf, respectively, with respect to the control oocytes, which was inhibited with mercury and  
378 partially reversed with  $\beta$ -mercaptoethanol only in the case of Aqp8ab (Fig. 2B). The three salmon  
379 Aqp8 paralogs were permeable to urea, but interestingly Aqp8ab and -8b also appeared to transport  
380 significant amounts of glycerol (Fig. 2B). The observed molecular weights of the Atlantic salmon  
381 Aqp8 paralogs in *X. laevis* oocyte membrane fractions were smaller than the theoretical estimates  
382 (Fig. 2C). However, when antibodies were used on membrane fractions from intestinal tissue, the  
383 major antigenic signal appeared at ~27-28 kDa (Fig. 3D, Aqp8ab and -8b). The antibodies detected  
384 high molecular bands >50kDa in both noninjected oocytes and oocytes injected with salmon Aqp8  
385 cRNA, but this non-specific band was not present in intestinal samples (Fig. 2C vs. 3D). However,  
386 in intestinal samples a ~38 kDa band was often seen (Fig. 3D). When the antibodies were used for  
387 immunofluorescence on noninjected oocytes only weak autofluorescence was observed (Fig. 2A  
388 (Ctrl), representative image).

389

### 390 *Tissue screening of salmon aquaporin 8 paralogs*

391 The Atlantic salmon *aqp8* paralogs each had a distinct expression profile in the range of tissues  
392 examined in this study. mRNAs of *aqp8aa(1+2)* were found mainly in the liver (Fig. 3A), but also  
393 at basal levels in nearly all other tissues examined, except for the brain, which showed slightly  
394 higher expression levels. mRNAs of *aqp8ab* were expressed exclusively in the intestinal segments  
395 and the spleen (Fig. 3C), while *aqp8b* mRNAs were expressed at varying levels in all tested tissues

396 (Fig. 3E). The most prominent *aqp8b* expression was found in the brain, but significant expression  
397 was also detected in osmoregulatory tissues such as the esophagus, intestine, kidney and gill. When  
398 comparing two long-term SW-acclimated salmon with two FW-acclimated salmon (Fig. 3D,F)  
399 *aqp8ab* mRNA (Fig. 3D) but not *aqp8b* mRNA (Fig. 3F) tended to be higher in the intestinal tissues  
400 of SW-acclimated salmon. Protein expression levels of Aqp8ab were accordingly high for Aqp8ab  
401 in 7 day SW-acclimated fish (Fig. 3B, lane a, see also Fig. 6)) but low in sham transferred fish (Fig  
402 3B, lane b), whereas it did not change for Aqp8b (Fig 3B, lane c,d). In the spleen there was a  
403 remarkably higher level of mRNA from both paralogs in SW- acclimated salmon even though the  
404 low n-number eliminated statistical comparisons (Fig 3D,F).

405

#### 406 *Cellular and subcellular localisation of salmon aquaporin 8 proteins*

407 Aqp8aa(1+2) was localized in intracellular compartments of enterocytes of the middle intestine,  
408 where staining was sub-apical below the brush border (Fig. 4A, inset). Aqp8aa(1+2) was also found  
409 in hepatocytes of the salmon liver where staining appeared in a granular pattern reminiscent of  
410 cytosolic vesicles (Fig. 4B). In the intestine, Aqp8ab was abundant in the enterocyte brush border in  
411 both middle and posterior intestine with some occasional staining of the basolateral plasma  
412 membrane domains of the enterocytes where it co-localized with the alpha subunit of the Na<sup>+</sup>, K<sup>+</sup>  
413 ATPase. (Fig. 4D,E; yellow staining). Aqp8b was found in the brush border membrane of the  
414 middle and posterior intestine (Fig. 4G,H). This protein was present in goblet cells of the middle  
415 intestine (Fig. 4G) but also found at subapical locations throughout the intestinal tissue (Fig. 4G,H).  
416 Pre-immune serum for each antibody showed no specific staining of the intestine but only a weak  
417 autofluorescence (Fig. 4C,F,I). To eliminate the possibility that the brush border staining observed  
418 for Aqp8ab and -8b was due to non specific binding of the primary antibody to the glycocalyx a  
419 control experiment using immunoelectron microscopy was performed on the closely related  
420 rainbow trout. Immunoelectron microscopy of the middle intestine of rainbow trout revealed  
421 abundant Aqp8ab and Aqp8b labeling of the apical plasma membrane (brush border) as well as  
422 labeling of intracellular vesicles located subapically in the enterocytes (Fig. 5A-D).

423

#### 424 *Time-course changes in protein expression of Aqp8ab and 8b in intestinal segments*

425 The abundance of the ~28 kDa Aqp8ab protein band in intestinal tissues significantly increased in  
426 response to SW-transfer (Fig. 6A,C). Seven days after SW-transfer the abundance of Aqp8ab was  
427 significantly higher in membrane fractions from pyloric caeca and the middle intestine of SW



428 transferred individuals compared to sham transferred fish. There was a significant interaction  
429 between "time" and "SW" on Aqp8ab expression in both tissues tested. High proteolytic activity in  
430 samples from the posterior intestine made it impossible to probe for changes in Aqp8ab and Aqp8b  
431 protein expression in this segment. Some truncated protein fragments between 10-14 kDa were  
432 detected by the Aqp8ab antibody in some intestinal samples from both SW- and FW-acclimated fish  
433 (Fig. 6E). A reaction with the Aqp8ab antibody was also seen around 38 kDa in samples with high  
434 abundance of the 28 kDa protein possibly reflecting a glycosylated form of the aquaporin (Fig. 6E).  
435 The abundance of the ~27 kDa Aqp8b protein did not change significantly in membrane fractions  
436 from pyloric caeca or the middle intestine during seven days of SW-acclimation, and the variation  
437 in protein abundance was high in both SW-acclimated fish and sham transferred fish (Fig. 6B,C,F).  
438 Time-course changes in Aqp8aa(1+2) protein expression were not investigated because of its low  
439 abundance in membrane fractions from intestinal tissues possibly due to its intracellular  
440 localization. Hence, it was a less obvious candidate for transcellular water transport.

441

## 442 **Discussion**

443 AQP8 is a versatile transmembrane channel expressed in multiple tissues of different mammals  
444 where it has been suggested to be involved in the maintenance of intracellular osmotic equilibrium,  
445 transport of ammonia and small organic solutes or mitochondrial expansion during oxidative  
446 phosphorylation (Elkjær et al., 2001, Calamita et al., 2005; Saparov et al., 2007). In contrast to  
447 mammals, in which only a single *AQP8* gene is known, the multiplicity of Aqp8 paralogs in fish  
448 offers a possibility of dissecting the evolutionary form and function of a closely related set of genes.  
449 The current study adds knowledge to the puzzle of Aqp8 evolution initiated recently through studies  
450 on zebrafish (Tingaud-Sequeira et al., 2010; Cerdà & Finn, 2010; Finn & Cerdà, 2011). We extend  
451 the available information by identifying novel transport properties of two Aqp8 paralogs in Atlantic  
452 salmon and show for the first time that the expression of Aqp8ab channels, which are located in the  
453 brush border of enterocytes, is upregulated in response to SW acclimation.

454

### 455 *Phylogenetic analysis of salmon aquaporin 8 paralogs*

456 The Bayesian analyses clearly show that the Atlantic salmon *aqp8* paralogs isolated in the present  
457 study are representatives of the three major classes of *aqp8* genes originally identified and  
458 characterized in zebrafish (Tingaud-Sequeira et al., 2010). The present observation that the  
459 subcluster topology closely follows the phylogenetic rank of each species and that each paralog



460 retains conserved features, such as the canonical and non-canonical NPA motifs, is consistent with  
461 an early diversification of the *aqp8* genes during fish evolution (Cerdà & Finn, 2010; Finn & Cerdà,  
462 2011). This became evident when the genomic synteny of the different paralogs was examined  
463 revealing that *aqp8aa* and *aqp8ab* are closely linked in distantly related teleost genomes whereas  
464 *aqp8b* is located on a different chromosome (Cerdà & Finn, 2010). The presence of a second  
465 *aqp8aa* gene reported here for Atlantic salmon is potentially consistent with the occurrence of a  
466 fourth round of genome duplication in the salmonid lineage (Moghadam et al., 2011).

467

#### 468 *Functional characteristics of salmon aquaporin 8 paralogs*

469 The permeability properties of mammalian AQP8 has been under dispute for some years, since  
470 studies of human, rat and mouse AQP8 using *X. laevis* oocytes or reconstituted liposomes have led  
471 to different conclusions. All studies show that AQP8 is water permeable but its ability to also  
472 transport small solutes such as urea is controversial (Liu et al., 2006; Yang et al., 2006). The three  
473 salmon aquaporin paralogs were successfully translated in *X. laevis* oocytes and the protein  
474 products transported to the plasma membrane as demonstrated by Western blotting of enriched  
475 membrane fractions and immunofluorescence microscopy. All paralogs showed significant water  
476 permeability, as expected from studies performed on mammalian AQP8 channels (Liu et al., 2006;  
477 Yang et al., 2006; Saparov et al., 2007). The significant urea permeability of all three paralogs  
478 corresponds well with the fact that two out of three zebrafish paralogs (Aqp8aa and Aqp8ab,  
479 Tingaud-Sequeira et al., 2010) and the murine AQP8 ortholog (Ma et al., 1997) are also permeable  
480 to urea. Rat and human AQP8, however, seem not to be urea permeable (Liu et al., 2006). Glycerol  
481 permeability has not been reported for any vertebrate Aqp8 ortholog, but this study shows that two  
482 of the Atlantic salmon paralogs, Aqp8ab and -8b, are significantly permeable to glycerol. It is  
483 somewhat surprising that the liver paralog Aqp8aa1 did not show glycerol permeability, since  
484 glycerol metabolism in this organ is of major importance. Aqp8aa2, which was not cloned and  
485 expressed in *X. laevis* oocytes, is suspected to function similarly as Aqp8aa1 due to their high  
486 degree of identical amino acid residues. The intestinal paralog Aqp8ab showed the highest glycerol  
487 permeability, perhaps suggesting a potential role of this aquaporin in glycerol mobilization in  
488 addition to water transport.

489

#### 490 *Tissue specific expression of aqp8 paralogs*

491 The tissue expression profile for Atlantic salmon *aqp8aa(1+2)* mRNA reported here is consistent  
492 with that of the *aqp8aa2* gene (formerly annotated as *aqp8a*, Tipsmark et al., 2010), which was  
493 highly expressed in the liver. The study by Tipsmark et al. (2010) may also have amplified *aqp8aa1*  
494 mRNA as the primers used then were the same as in the current study and they are unable to  
495 distinguish between the two paralogs. The *aqp8aa1* paralog was cloned from the liver and thus is  
496 expressed in this tissue to some degree. Due to the high similarity between the two *aqp8aa* paralogs  
497 in comparison with the other *aqp8* paralogs in salmon, one might expect them still to be expressed  
498 in the same tissues. On the other hand, as is seen with *aqp8*'s in several teleosts, the expression  
499 patterns of the paralogs are highly dynamic and may be subjected to selection early on after a  
500 genomic duplication event. A final answer to the evolutionary kinship between *aqp8aa1* and  
501 *aqp8aa2* and the relative abundance of the two paralogs await further investigation which will be  
502 more interesting from an evolutionary perspective than an osmoregulatory one. The tissue  
503 expression profile of the Atlantic salmon *aqp8ab* gene is more similar to that reported for the  
504 zebrafish *aqp8ab* gene (Tingaud-Sequeira et al., 2010). The presence of *aqp8* mRNAs in intestinal  
505 segments has been observed earlier in different teleosts although the particular paralog expressed  
506 varies between species. For example, eels may express the *aqp8aa* paralog (Cutler et al., 2009; Kim  
507 et al., 2010), zebrafish expresses both the *aqp8aa* and *-8ab* paralogs (Tingaud-Sequeira et al.,  
508 2010), while Atlantic salmon expresses the *aqp8ab* and *-8b* paralogs (Tipsmark et al., 2010, and  
509 present study). In Atlantic salmon, *aqp8ab* mRNA was also present in the spleen, where its apparent  
510 upregulation in SW acclimated animals has not been reported previously. This expression must take  
511 place in the splenic tissue itself and not in the abundant blood cells, since a screening of mixed  
512 blood cells from the closely related rainbow trout did not reveal any expression of *aqp8ab* mRNA  
513 (M.B. Englund, unpublished observations). There are as yet no other reports of *Aqp8* expression in  
514 the teleost spleen. The intestinal levels of *aqp8ab* mRNA tended to be elevated in long term SW-  
515 acclimated animals which is consistent with earlier findings (Cutler et al., 2009; Kim et al., 2010;  
516 Tipsmark et al., 2010). In contrast to the tandemly duplicated *aqp8aa1* and *-8ab* transcripts,  
517 expression of *aqp8b* is more ubiquitous, with the highest expression levels occurring in the brain.  
518 The earlier study in zebrafish (Tingaud-Sequeira et al., 2010) only found expression of *aqp8b*  
519 mRNA in the brain, thus the expression of this paralog seems to be highly species specific. As  
520 noted for *aqp8ab*, there seemed to be a higher expression of *aqp8b* in the spleen upon SW  
521 acclimation, which could represent expression in blood cells or in the splenic tissue itself.

522

523 *Cellular and subcellular localization of salmon aquaporin 8 proteins*

524 Only selected tissues were investigated by immunofluorescence microscopy in this study because of  
525 our focus on the role of Aqp8 in water transport upon SW acclimation. The intracellular  
526 immunolocalization of Aqp8aa(1+2) in both the liver and intestine of Atlantic salmon resonates  
527 well with earlier findings of AQP8 in mammals. For example, vesicular localization of AQP8 has  
528 been reported in rat kidney tubules (Elkjær et al. (2001), subapical localization in the jejunum and  
529 duodenum (Elkjær et al., 2001; Laforenza et al., 2005; Tritto et al., 2007) with intracellular  
530 localization noted in colonic enterocytes and hepatocytes (Elkjær et al., 2001). The hepatic vesicular  
531 localization in rat was confirmed in studies by Garcia et al. (2001), who further demonstrated that  
532 cAMP was a strong stimulus for redistribution of the protein to the plasma membrane. Mammalian  
533 AQP8 has also been located to the inner mitochondrial membrane of rat hepatocytes (Calamita et  
534 al., 2005), where it is proposed to regulate mitochondrial water permeability. The present finding of  
535 salmon Aqp8aa(1+2) in the liver is strikingly similar to that reported in rat hepatocytes (Calamita et  
536 al., 2005), and seems to correspond to a mitochondrial or vesicular localization for this aquaporin.  
537 However, firm conclusions should await further examination by immunoelectron microscopy.  
538 The brush border membrane localization of both Aqp8ab and -8b in the two salmonid species  
539 investigated here supports and extends the hypothesis of Tipsmark et al. (2010) and Madsen et al.  
540 (2011) that these aquaporins are important regulators of intestinal transepithelial water transport.  
541 The immunoelectron microscopy of Aqp8ab and Aqp8b in the rainbow trout intestine paralleled the  
542 findings by immunofluorescence in the intestine of Atlantic salmon. Unpublished observations from  
543 our laboratory using immunofluorescence or immunohistochemistry also show similar results in  
544 rainbow trout intestine with the Aqp8ab and -8b antibodies. Alignment of a known Aqp8ab from  
545 rainbow trout (Acc#CU071568) with the salmon Aqp8ab showed 100% identity at the antibody  
546 epitope and labeling with the Aqp8ab antibody is therefore likely a representative of a rainbow trout  
547 paralog. The antibody raised against Atlantic salmon Aqp8ab was developed based on EST data  
548 (Madsen et al., 2011). Due to a non-synonymous nucleotide polymorphism there is a single amino  
549 acid mismatch at the end of the epitope compared to the cloned paralog and the rainbow trout  
550 sequence (T in the antigenic peptide, P in the salmonid paralogs), however this does not seem to  
551 affect the binding of the antibody to the protein. There are currently no available EST data on  
552 rainbow trout Aqp8b, but based on the phylogenetic proximity of this species to the Atlantic salmon  
553 and the high similarity between Atlantic salmon and rainbow trout Aqp8aa and Aqp8ab proteins,  
554 we suspect that there is an Aqp8b paralog expressed in the intestine of rainbow trout with a similar

555 localization as observed for this paralog in Atlantic salmon. The intracellular localization of Aqp8b  
556 in the enterocytes and its presence in some goblet cells in the middle intestine suggest that different  
557 sorting mechanisms may exist for this and the Aqp8ab protein. Cross reactivity between the  
558 antibodies for the three different paralogs could be a valid concern, however control experiments  
559 using *X. laevis* oocytes showed that cross reactivity was minimal. Nevertheless, it cannot be  
560 excluded that the conformations of the proteins in the fixed intestine are such that cross reactivity  
561 might occur and yield false positive results. In addition, binding of primary antibodies to glycocalyx  
562 is sometimes mistaken as binding of the antibody to apical membrane proteins of intestinal epithelia  
563 or other mucous coated surfaces. However, the immunoelectron microscopy shows that binding of  
564 the antibodies to Aqp8ab and -8b in the apical membrane is indeed specific and not an artifact. The  
565 intestinal staining pattern of Aqp8ab and Aqp8b agree quite well with previously published results  
566 from the rat (Elkjær et al., 2001; Laforenza et al., 2005; Tritto et al., 2007) although the strongest  
567 staining in the small intestine of the rat with the AQP8 antibody was seen in the sub-apical part of  
568 the enterocytes rather than the brush border membrane found here in the salmon intestine. The  
569 immunoelectron microscopy also detected Aqp8ab and Aqp8b labeling in subapical vesicular  
570 structures. Whether Aqp8 proteins located in these vesicular structures are destined for plasma  
571 membrane insertion, degradation or recycling to other cellular compartments is presently unknown  
572 and requires closer investigation of marker proteins expressed in the vesicles associated with Aqp8  
573 labeling. Different trafficking mechanisms may be responsible for recruiting the Aqp8 proteins to  
574 the intestinal brush border membrane. Trafficking may involve kinase phosphorylation of the  
575 proteins, and from this perspective it is interesting to note that Aqp8aa1 and -8b have predicted N-  
576 terminal serine phosphorylation residues that are missing in the Aqp8ab protein (*in silico* prediction  
577 using NetPhos 2.0; Blom et al., 1999). The role of these residues awaits further investigation.

578

#### 579 *Effect of seawater on protein expression of Aqp8ab and Aqp8b*

580 The increasing intestinal expression of the Aqp8ab protein upon SW challenge supports previous  
581 reports of elevated *aqp8* mRNA levels in the intestine of various fish species exposed to SW (Cutler  
582 et al., 2009; Tipsmark et al., 2010, Kim et al., 2010). These findings underline the important role of  
583 this paralog in transforming the intestine into a water-absorptive organ when fish are exposed to  
584 hyperosmotic conditions. In this study, we analyzed protein expression in an enriched plasma  
585 membrane fraction, thus suggesting a functional membrane localization of Aqp8ab as observed by  
586 immunoelectron microscopy of Aqp8ab in the rainbow trout intestine. The immunoblots revealed

587 bands of higher and lower expected molecular weight than the native Aqp8 proteins. The nature of  
588 these bands are unknown at present but might reflect post translationally modified Aqp8 proteins  
589 (e.g. coupled to sugars, ubiquitin, etc.). As suggested by Madsen et al., (2011), apical as well as  
590 basolateral localization of Aqp8ab may create a regulated transcellular pathway of water movement,  
591 which may be supplemented by apical expression of other aquaporin paralogs - especially Aqp1aa  
592 (Martinez et al., 2005a, Raldúa et al., 2008, Madsen et al., 2011). Recent experiments using  
593 radiolabelled polyethylene glycol molecules in the intestine of killifish (*Fundulus heteroclitus*) have  
594 indeed shown that the transcellular route of water absorption is more important than the paracellular  
595 route (Wood & Grosell, 2012). Regulation of aquaporin expression in the intestine of fish upon SW  
596 challenge could thus prove valuable to the understanding of osmotic homeostasis in the intestine of  
597 vertebrates. In contrast to Aqp8ab, immunoblotting did not reveal any regulation of membrane  
598 bound Aqp8b protein or its mRNA upon SW transfer. This protein was localized apically, both in  
599 the brush border zone as well as sub-apically in vesicular compartments. The apparent lack of  
600 regulation and the ubiquitous tissue distribution suggests that Aqp8b performs a housekeeping  
601 function such as cell volume regulation or is associated with water homeostasis of intracellular  
602 compartments. A role in mucus secretion is also suggested by the presence of this paralog in goblet  
603 cells.

604

### 605 *Conclusions and perspectives*

606 In summary, we have characterized three main classes of Aqp8 in the Atlantic salmon. There appear  
607 to be yet more *aqp8* paralogs in the genome of Atlantic salmon as judged from the extra *aqp8aa*  
608 paralog which is consistent with the partial tetraploid status of this species. The paralogs  
609 investigated in the current study show divergent expression patterns, which suggests that they  
610 perform different functions in the tissues where they are expressed. Aqp8aa(1+2) is the main  
611 paralog expressed in the liver and may be involved in maintaining internal osmotic balance in  
612 hepatocytes or perhaps be involved in bile fluid formation, but the specific role of each paralog  
613 requires further investigation. Our data support a physiological role of Aqp8ab in the transcellular  
614 water uptake across intestinal enterocytes upon SW exposure where Aqp8b may play a supporting  
615 role. Goblet cell expression of Aqp8b suggests that this protein has a role in mucus  
616 production/secretion, as suggested for Aqp1aa (*S. salar* intestine: Madsen et al., 2011) and Aqp3b  
617 (*A. anguilla* rectum: Lignot et al., 2002; esophagus: Cutler et al., 2007). The acquired glycerol  
618 permeability of the Aqp8ab and Aqp8b paralogs and their distinct expression profiles suggest that

619 the Atlantic salmon Aqp8 water channels have neofunctionalized. In future studies it will be  
620 important to decipher the hormonal and environmental factors that initiate the divergent expression  
621 patterns and the structural alterations that facilitated a broader selection of solutes to permeate the  
622 channel.

623

#### 624 **Acknowledgements**

625 The staff at the Danish centre for Wild Salmon is thanked for their help with animal husbandry and  
626 seawater challenge experiments. Annette Duus and Else-Merete Løcke are thanked for valuable  
627 technical assistance. This study was supported by grants from the Danish Natural Research Council  
628 (09-070689 to SSM), a Grant of the Spanish Ministry of Science and Innovation (MICINN;  
629 AGL2010-15597) to J.C., and a Grant from the Research Council of Norway (204813) to R.N.F.  
630 B.M.C. was supported by The Danish Council for Independent Research - Medical Sciences and the  
631 Lundbeck Foundation and F.C. was supported by a postdoctoral contract Juan de la Cierva from  
632 Spanish MICINN.

633

634 **References**

635 **Ando, M., Mukuda, T., and Kozaka, T.** (2003). Water metabolism in the eel acclimated to  
636 seawater: from mouth to intestine. *Comp. Biochem. Physiol. B* **136**, 621-633.

637

638 **Beyenbach, K.** (2004). Kidneys sans glomeruli. *Am. J. Physiol., Renal. Physiol.* **286**, F811-F827.

639

640 **Blom, N., Gammeltoft, S., and Brunak, S.** (1999). Sequence- and structure-based prediction of  
641 eukaryotic protein phosphorylation sites. *J. Mol. Biol.* **294**, 1351-1362.

642

643 **Brown, J. A., Jackson, B. A., Oliver, J. A., and Henderson, I. W.** (1978). Single nephron  
644 filtration rates (SNGFR) in the trout, *Salmo gairdneri*. *Pflügers Arch.* **377**, 101-108.

645

646 **Brown J. A., Oliver J. A., Henderson I. W., and Jackson B. A.** (1980). Angiotensin and single  
647 nephron glomerular function in the trout, *Salmo gairdneri*. *Am. J. Physiol., Regul. Integr. Comp.*  
648 *Physiol.* **239**, R509–R514.

649

650 **Buddington, R. K., and Diamond, J. M.** (1987). Pyloric ceca of fish: a “new” absorptive organ.  
651 *Am. J. Physiol., Gastrointestinal and Liver Physiol.* **252**, G65-G76.

652

653 **Calamita G., Ferri, D., Gena, P., Liquori, G. E., Cavalier, A., Thomas, D., and Svelto, M.**  
654 (2005). The Inner Mitochondrial Membrane Has Aquaporin-8 Water Channels and is Highly  
655 Permeable to Water. *J. Biol. Chem.* **280** (17), 17149-17153

656

657 **Cerdà, J. and Finn, R. N.** (2010). Piscine aquaporins: an overview of recent advances. *J. Exp.*  
658 *Zool.* **313A**, 1-28.

659

660 **Cutler, C.P. and Cramb, G.** (2002). Branchial expression of an aquaporin 3 (AQP-3) homologue  
661 is downregulated in the European eel (*Anguilla anguilla*) following seawater acclimation. *J. Exp.*  
662 *Biol.* **205**, 2643-2651.

663

664 **Cutler, C.P., Martinez, A.S., and Cramb, G.** (2007). The role of aquaporin 3 in teleost fish.  
665 *Comp. Biochem. Physiol.* **148A**, 82-91.



666

667 **Cutler, C. P., Philips, C., Hazon, N., and Cramb, G.** (2009). Aquaporin 8 (AQP8) intestinal  
668 mRNA expression increases in response to salinity acclimation in yellow and silver European eels  
669 (*Anguilla anguilla*). *Comp. Biochem. Physiol., Mol. Integr. Physiol.* **153A**, 78.

670

671 **Davidson, W.S., Koop B. F., Jones, S. J. M., Iturra, P., Vidal, R., Maass, A., Jonassen, I., Lien,**  
672 **S., and Omholt, S.** (2010). Sequencing the genome of the Atlantic salmon (*Salmo salar*). *Genome*  
673 *Biology* **11**, 403-409.

674

675 **Deen, P. M. T., Verdijk, M. A. J., Knoers, N., Wieringa, B., Monnens, L. A., van Os, C. H.,**  
676 **and van Oost, B. A.** (1994). Requirement of human renal water channel aquaporin-2 for  
677 vasopressin-dependent concentration of urine. *Science* **264**, 92-95.

678

679 **Elkjær, M. L., Nejsum, L. N., Grecz, V., Kwon, T. H., Jensen, U. B., Frøkiær, J., and Nielsen,**  
680 **S.** (2001). Immunolocalization of aquaporin-8 in rat kidney, gastrointestinal tract, testis and  
681 airways. *Am. J. Physiol., Renal Physiol.* **281**, F1047-F1057.

682

683 **Engelund, M. B. and Madsen, S. S.** (2011). The role of aquaporins in the kidney of euryhaline  
684 teleosts. *Front. Physiol* **2**, 51. doi: 10.3389/fphys.2011.00051

685

686 **Evans, D. H., Piermarini, P. M., and Choe, K. P.** (2005). The multifunctional fish gill: Dominant  
687 site of gas exchange, osmoregulation, acid-base regulation, and excretion of nitrogenous waste.  
688 *Physiol Rev* **85**, 97-177.

689

690 **Fabra, M., Raldúa, D., Bozzo, M. G., Deen, P. M. T., Lubzens, E., and Cerdà, J.** (2006). Yolk  
691 proteolysis and aquaporin-1o play essential roles to regulate fish oocyte hydration during meiosis  
692 resumption. *Develop. Biol.* **295**, 250-262.

693

694 **Fabra, M., Raldúa, D., Power, D. M., Deen, P. M. T., and Cerdà, J.** (2005). Marine fish egg  
695 hydration is aquaporin-mediated. *Science* **307**, 545.

696

697 **Finn, R. N. and Cerdà, J.** (2011). Aquaporin evolution in fishes. *Front. Physiol.* **2**, 44. doi:  
698 10.3389/fphys.2011.00044.  
699

700 **García, F., Kierbel, A., Larocca, M. C., Gradilone, S. A., Splinter, P., LaRusso, N. F., and**  
701 **Marinelli, R. A.** (2001). The Water Channel Aquaporin-8 Is Mainly Intracellular in Rat  
702 Hepatocytes, and Its Plasma Membrane Insertion Is Stimulated by Cyclic AMP. *J. Biol. Chem.* **276**  
703 (15), 12147-12152.  
704

705 **Grosell M, O'Donnell, M. J., Wood, C. M.** (2000). Hepatic versus gallbladder bile composition:  
706 in vivo transport physiology of the gallbladder in rainbow trout. *Am. J. Physiol., Regul. Integr.*  
707 *Comp. Physiol.* **278**, R1674-R1684.  
708

709 **Hiroi, J., McCormick, S.D., Ohtani-Kaneko, R., and Kaneko, T.** (2005). Functional  
710 classification of mitochondrion-rich cells in euryhaline Mozambique tilapia (*Oreochromis*  
711 *mossambicus*) embryos, by means of triple immunofluorescence staining for Na/K<sup>+</sup>-ATPase,  
712 Na<sup>+</sup>/K<sup>+</sup>/2Cl<sup>-</sup> cotransporter and CFTR anion channel. *J. Exp. Biol.* **208**, 2023-2036.  
713

714 **Hwang, P. P., Lee, T.H., and Lin, L. Y.** (2011). Ion regulation in fish gills: recent progress in the  
715 cellular and molecular mechanisms. *Am. J. Physiol., Regul. Integr. Comp. Physiol.* **301**, R28-R47.  
716

717 **Kamsteeg, E. J. and Deen, P. M.** (2001). Detection of aquaporin-2 in the plasma membranes of  
718 oocytes: a novel isolation method with improved yield and purity. *Biochem Biophys Res Commun.*  
719 **282**, 683-690.  
720

721 **Karnaky K. J.** (1986). Structure and Function of the Chloride Cell of *Fundulus-Heteroclitus* and  
722 Other Teleosts. *Am. Zool.* **26**, 209-224.  
723

724 **Katoh, K. and Toh, H.** (2008). Recent developments in the MAFFT multiple sequence alignment  
725 program. *Brief. Bioinform.* **9**, 286–298.  
726

727 **Kim, Y. K., Watanabe, S., Kaneko, T., Do Huh, M., and Park, S. I.** (2010). Expression of  
728 aquaporins 3, 8 and 10 in the intestines of freshwater- and seawater-acclimated Japanese eels  
729 *Anguilla japonica*. *Fish. Sci.* **76**, 695-702.  
730  
731 **Laforenza, U., Cova, E., Gastaldi, G., Tritto, S., Grazioli, M., LaRusso, N. F., Splinter, P. L.,**  
732 **D'Adamo, P., Tosco, M., and Ventura, U.** (2005). Aquaporin-8 is involved in water transport in  
733 isolated superficial colonocytes from rat proximal colon. *J. Nutrit.* **135**, 2329-2336.  
734  
735 **Lignot, J. H., Cutler, C. P., Hazon, N., and Cramb, G.** (2002). Immunolocalisation of aquaporin  
736 3 in the gill and the gastrointestinal tract of the European eel *Anguilla anguilla* (L.). *J. Exp. Biol.*  
737 **205**, 2653-2663.  
738  
739 **Liu, K., Nagase, H., Huang, C. G., Calamita, G., and Agre, P.** (2006). Purification and  
740 functional characterization of aquaporin-8. *Biol. Cell* **98**, 153-161  
741  
742 **Ma, T., Yang, B., and Verkman, A. S.** (1997). Cloning of a Novel Water and Urea-Permeable  
743 Aquaporin from Mouse Expressed Strongly in Colon, Placenta, Liver and Heart. *Biochemical and*  
744 *Biophysical Research Communications* **240**, 324-328.  
745  
746 **Madsen, S. S., Olesen, J. H., Bedal, K., Engelund, M. B., Velasco-Santamaría, Y. M., and**  
747 **Tipsmark, C. K.** (2011). Functional characterization of water transport and cellular localization of  
748 three aquaporin paralogs in the salmonid intestine. *Front. Physiol.* **2**, 56. doi:  
749 10.3389/fphys.2011.00056  
750  
751 **Martinez, A. S., Cutler, C. P., Wilson, G. D., Phillips, C., Hazon, N., and Cramb, G.** (2005a).  
752 Regulation of expression of two aquaporin homologs in the intestine of the European eel: effects of  
753 seawater acclimation and cortisol treatment. *Am. J. Physiol., Regul. Integr. Comp. Physiol.* **288**,  
754 R1733–R1743.  
755  
756 **Martinez, A. S., Cutler, C. P., Wilson, G. D., Phillips, C., Hazon, N., and Cramb, G.** (2005b).  
757 Cloning and expression of three aquaporin homologues from the European eel (*Anguilla anguilla*):  
758 effects of seawater acclimation and cortisol treatment on renal expression. *Biol. Cell* **97**, 615-627.

759

760 **McDonald, M. D.** (2007). The renal contribution to salt and water balance. In *Fish Osmoregulation*  
761 (ed. B. Baldisserotto, J. M. M. Romero and B. G. Kapoor), pp. 322-345. Enfield, NH, USA: Science  
762 Publishers.

763

764 **Moghadam, H.K., Ferguson, M.M., and Danzmann, R.G.** (2011). Whole genome duplication:  
765 challenges and considerations associated with sequence orthology assignment in Salmoninae. *J.*  
766 *Fish Biol.* **79**, 561-574.

767

768 **Notredame, C., Higgins, D.G., and Heringa, J.** (2000). T-Coffee: a novel method for fast and  
769 accurate multiple sequence alignment. *J. Mol. Biol.* **302**, 205–217.

770

771 **Olsvik, P. Å., Lie, K. K., Jordal, A. O., Nilsen, T. O., and Hordvik, I.** (2005). Evaluation of  
772 potential reference genes in real-time RT-PCR studies of Atlantic salmon. *BMC Mol. Biol.* **6**, Art.  
773 21.

774

775 **Pfaffl M. W.** (2001). A new mathematical model for relative quantification in real-time RT-PCR.  
776 *Nucleic Acids Res* **29**, e45.

777

778 **Raldúa, D., Otero, D., Fabra, M., and Cerdà, J.** (2008). Differential localization and regulation  
779 of two aquaporin-1 homologs in the intestinal epithelia of the marine teleost *Sparus aurata*. *Am. J.*  
780 *Physiol., Regul. Integr. Comp. Physiol.* **294**, R993-R1003.

781

782 **Ronquist, F. and Huelsenbeck, J.P.** (2003). MrBayes 3: Bayesian phylogenetic inference under  
783 mixed models. *Bioinformatics* **19**, 1572–1574.

784

785 **Rozen, S. and Skaletsky, H. J.** (2000). Primer3 on the WWW for general users and for biologist  
786 programmers. In *Bioinformatics Methods and Protocols: Methods in Molecular Biology* (e.d. S.  
787 Krawetz, and S. Misener), pp. 365-386. Totowa, NJ: Humana Press.

788

789 **Saparov, S. M., Liu, K., Agre, P., and Pohl, P.** (2007). Fast and Selective Ammonia Transport by  
790 Aquaporin-8. *J. Biol. Chem.* **282**, 5296-5301.

791

792 **Smith, H. W.** (1932). The absorption and excretion of water and salts by marine teleosts. *Q. Rev.*  
793 *Biol.* **7**, 1-26.

794

795 **Sundell, K., Jutfelt, F., Ágústsson, T., Olsen, R., Sandblom, E., Hansen, T., and Björnsson, B.**  
796 **T.** (2003). Intestinal transport mechanisms and plasma cortisol levels during normal and out-of-  
797 season parr-smolt transformation of Atlantic salmon, *Salmo salar*. *Aquaculture* **222**, 265-285.

798

799 **Sundell, K. S. and Sundh, H.** (2012). Intestinal fluid absorption in anadromous salmonids:  
800 importance of tight junctions and aquaporins. *Front. Physiol.* **3**:388. doi: 10.3389/fphys.  
801 2012.00388

802

803 **Suyama, M., Torrents, D. and Bork, P.** (2006). PAL2NAL: robust conversion of protein sequence  
804 alignments into the corresponding codon alignments. *Nucleic Acids Res.* **34**, W609–W612.

805

806 **Swafford, D.L.** (2002). PAUP\*. Phylogenetic analysis using parsimony (\*and other models).  
807 Version 4.0b10 for macintosh. Sinauer Associates Inc, Sunderland, Mass.

808

809 **Tingaud-Sequeira, A., Calusinska, M., Finn, R. N., Chauvigné, F., Lozano, J., and Cerdà, J.**  
810 (2010). The zebrafish genome encodes the largest vertebrate repertoire of functional aquaporins  
811 with dual paralogy and substrate specificities similar to mammals. *BMC Evol. Biol.* **10**, 38

812

813 **Tipsmark, C. K., Kiillerich, P., Nilsen, T. O., Ebbesson, L. O. E., Stefansson, S.O., and Madsen**  
814 **S. S.** (2008). Branchial expression patterns of claudin isoforms in Atlantic salmon during seawater  
815 acclimation and smoltification. *Am. J. Physiol., Regul. Integr. Comp. Physiol.* **294**, R1563-R1574.

816

817 **Tipsmark, C. K., Sørensen, K. J., and Madsen, S. S.** (2010). Aquaporin expression dynamics in  
818 osmoregulatory tissues of Atlantic salmon during smoltification and seawater acclimation. *J. Exp.*  
819 *Biol.* **213**, 368-379.

820

821 **Tritto, S., Gastaldi, G., Zelenin, S., Grazioli, M., Orsenigo, M. N., Ventura, U., Laforenza, U.,**  
822 **and Zelenina, M.** (2007). Osmotic water permeability of rat intestinal brush border membrane

823 vesicles: involvement of aquaporin-7 and aquaporin-8 and effect of metal ions. *Biochem. Cell Biol.*  
824 **85** (6), 675-684.

825

826 **Usher, M. L., Talbot, C., and Eddy, F. B.** (1988). Drinking in Atlantic Salmon Smolts  
827 Transferred to Seawater and the Relationship Between Drinking and Feeding. *Aquaculture* **73**, 237-  
828 246.

829

830 **Wood, C. M. and Grosell, M.** (2012). Independence of net water flux from paracellular  
831 permeability in the intestine of *Fundulus heteroclitus*, a euryhaline teleost. *J. Exp. Biol.* **215**, 508-  
832 517.

833

834 **Yang, B., Zhao, D., Solenov, E. and Verkman, A. S.** (2006). Evidence from knockout mice  
835 against physiologically significant aquaporin 8-facilitated ammonia transport. *Am. J. Physiol, Cell.*  
836 *Physiol.* **291**, C417-C423.

837

838 **Zapater, C., Chauvigné, F., Fernández-Gómez, B., Finn, R.N., and Cerdà, J.** (2013).  
839 Alternative splicing of the nuclear progesterin receptor in a perciform teleost generates novel  
840 mechanisms of dominant-negative transcriptional regulation. *Gen. Comp. Endocrinol.* **182**, 24-40.

841

842 **Zapater, C., Chauvigné, F., Norberg, B., Finn, R.N., and Cerdà, J.** (2011). Dual  
843 Neofunctionalization of a rapidly evolving aquaporin-1 paralog resulted in constrained and relaxed  
844 traits controlling channel function during meiosis resumption in teleosts. *Mol. Biol. Evol.* **28**, 3151-  
845 3169.

846

847

848

849 **Figure Legends.**

850 Figure 1. Molecular phylogeny of Atlantic salmon Aqp8 paralogs. (A) Bayesian majority rule  
851 consensus tree of the codon alignment. The tree is midpoint rooted. Posterior probabilities derived  
852 from 5 million MCMC generations of the codon/amino acid alignments are shown at each node.  
853 Scale bar represents the rate of nucleotide substitution per site. (B) Multiple sequence alignment of  
854 the Atlantic salmon (Ss) and zebrafish (Dr) Aqp8 paralogs highlighting the N-termini (NT), the five  
855 loops (A-E), the helical domains (H1-8), and the C-termini (CT). Fully conserved residues are  
856 boxed and shaded dark grey, while residues with similar chemical properties are shaded in light  
857 grey.

858

859 Figure 2. (A) Immunofluorescence micrographs of *X. laevis* oocytes expressing salmon aquaporin 8  
860 paralogs and a noninjected control oocyte probed with one of the salmon Aqp antibodies  
861 (representative image). Size bars are 50  $\mu\text{m}$ . B) Relative permeability to water (left panel), urea and  
862 glycerol (right panel) of *X. laevis* oocytes expressing salmon aquaporin 8 paralogs. Left:  
863 Noninjected oocytes or oocytes injected with cRNA corresponding to Aqp8aa1, Aqp8ab or Aqp8b  
864 subjected to swelling assays without further treatment (Ctrl) or subjected to 0.1mM HgCl (Hg) and  
865 in some cases followed by 5 mM  $\beta$ -mercaptoethanol to test for recovery prior to swelling assay.  
866 Asterisk indicate significant difference in relative water permeability between non injected and Ctrl  
867 oocytes \*\*\*:  $P < 0.001$ . Right: Radioactive uptake of [ $^3\text{H}$ ] glycerol or [ $^{14}\text{C}$ ] urea by water injected  
868 oocytes or oocytes injected with cRNA as explained above. Asterisk indicate significant difference  
869 from water injected oocytes \*\*:  $P < 0.01$ , \*\*\*:  $P < 0.001$ . Presented data is from one representative  
870 experiment and shown as mean  $\pm$  SEM, N=12-20. C) Immunoblots of membrane fractions from *X.*  
871 *laevis* oocytes expressing Aqp8aa1, Aqp8ab or Aqp8b. Each antibody was probed against an  
872 enriched membrane fraction from oocytes expressing one of the three salmon aquaporin 8 paralogs  
873 or from control (C) oocytes. Molecular weight marker is shown on the left side.

874

875 Figure 3. (A,C,E) Tissue mRNA expression patterns of three Atlantic salmon *aqp8* paralogs.  
876 Tissues are shown in (E). mRNA expression is measured relative to *ef1a* and shown as mean  $\pm$   
877 SEM. N = 4, representing two SW acclimated and two FW acclimated salmon. n.d.: Not detected.  
878 Different letters indicate significant differences between tissue expression levels in each panel  
879 ( $P < 0.05$ ). (B) Immunoblots of membrane fractions from pyloric caeca of 7 days SW-acclimated



880 salmon (a and d) and 7 day sham transferred FW salmon (b and c) probed with antibodies against  
881 Aqp8ab (a and b) or Aqp8b (c and d). Arrows point to native Aqp protein bands. Molecular weight  
882 marker is shown on the left side. (D,F) mRNA expression patterns in relation to osmotic  
883 environment of *aqp8ab* and *-8b* in intestinal tissue and spleen (shown in F). FW: freshwater, SW:  
884 seawater, PC: pyloric caeca, MI: middle intestine, PI: posterior intestine, Spl.: spleen. Data is shown  
885 as the mean value (N = 2).

886

887 Figure 4. Immunofluorescence micrographs of salmon aquaporin 8 paralogs in SW-acclimated  
888 salmon. (A) Aqp8aa(1+2) (green) and the alpha subunit of the Na<sup>+</sup>, K<sup>+</sup>, ATPase (red) in middle  
889 intestine. Inset: sub-apical localization of Aqp8aa(1+2). Asterisk in (A) and inset show enlarged  
890 area and arrowhead point to approximate localization of the brush border. (B) Aqp8aa(1+2) (green)  
891 in hepatic tissue, nuclei are counterstained with DAPI (blue). (C,F,I) pre-immune serum (green) for  
892 Aqp8aa(1+2) (C), Aqp8ab (F) and Aqp8b (I) and the alpha subunit of the Na<sup>+</sup>, K<sup>+</sup>, ATPase (red) in  
893 middle intestine. (D,E,G,H) Aqp8ab (D,E) (green) and Aqp8b (G,H) (green) and the alpha subunit  
894 of the Na<sup>+</sup>, K<sup>+</sup>, ATPase (red) in middle intestine (D,G) and posterior intestine (E,H). Short arrows  
895 in A and B point to intracellular vesicles. Long open arrows in D,E,G,H mark goblet cells and  
896 arrowheads point to the brush border membrane of the intestinal epithelium. Size bars are 50 μm  
897 except B where it is 25 μm.

898

899 Figure 5. Immunoelectron micrographs of Aqp8ab (A,B) and Aqp8b (C,D) in the middle intestine  
900 of rainbow trout. (A and C) Both Aqp8ab and Aqp8b are abundantly expressed in the apical plasma  
901 membrane (brush border) of enterocytes (arrows). (B and D) Expression of Aqp8ab and Aqp8b is  
902 also seen in intracellular vesicles located subapically in the cell (arrowheads). Size bars are 0.5 μm.

903

904 Figure 6. The effect of SW-transfer on Aqp8ab (A,C) and Aqp8b (B,D) protein expression in  
905 pyloric caeca (top panels) and middle intestine (lower panels) membrane fractions. Data are  
906 normalized with respect to expression levels of β-actin proteins. Open squares represent SW-  
907 transferred fish and closed circles represent sham transferred fish. Significant interaction between  
908 time and treatment are indicated by \*\*\*SW x time (P<0.001). \*\*\* above data points show  
909 significant difference between SW and sham transferred fish at that time point (P<0.001). Data are  
910 shown as means ± SEM, N = 4-6. (E,F) Representative immunoblots of membrane fractions from  
911 pyloric caeca of SW acclimated and sham transferred salmon. The blots were probed with

912 antibodies against Atlantic salmon Aqp8ab (E) or Aqp8b (F). Arrows point to protein bands used  
913 for the semi quantitative analysis in A-D.

914 Table 1. Primers used for cloning and QPCR of salmon aquaporin 8 paralogs

| 915 | Primer          | Primer sequence 5'→3'                             | Amplicon size |
|-----|-----------------|---------------------------------------------------|---------------|
| 916 | 8aa1OFP         | GTAAGTGACACAGAGAGCAGCAGTA                         | 832 bp.       |
| 917 | 8aa1ORP         | GTAAGTGACACAGAGAGCAGCAGTA                         |               |
| 918 | 8aa1CFP         | <i>ACTAGATCTAT</i> <b>GT</b> TCTGTGATAGAGTCAAAGAC | 816 bp.       |
| 919 | 8aa1CRP         | <i>AGCGATATCTT</i> <b>ACTT</b> CAGAACAAGACGTGTCT  |               |
| 920 | 8abCFP          | <i>ACTAGATCTAT</i> <b>G</b> GGAGTTGAGAAAATGGAGCT  | 798 bp.       |
| 921 | 8abCRP          | <i>CGCGATATCTC</i> <b>ACTT</b> CATGATGATTCGTGTCTT |               |
| 922 | 8bbOFP          | TCTCTCCAAACTCCTTTCCA                              | 858 bp.       |
| 923 | 8bbORP          | TGGCACTGCATGTAACAACA                              |               |
| 924 | 8bbCFP          | <i>ACTAGATCTAT</i> <b>G</b> ACAGAAGGGACAATGGAAC   | 798 bp.       |
| 925 | 8bbCRP          | <i>CGCGATATCTT</i> <b>ACTT</b> CATGAGAATACGTGTCTT |               |
| 926 | 8aa(1+2)QPCRFP* | TCATGACCCTCTTCCTGTCC                              | 145 bp.       |
| 927 | 8aa(1+2)QPCRRP* | GGGTTTCATACACCCTCCAGA                             |               |
| 928 | 8abQPCRFP*      | GGAGCTGCCATGTCAAAGAT                              | 159 bp.       |
| 929 | 8abQPCRRP*      | CGCCCCTAGCAATACTACCA                              |               |
| 930 | 8bQPCRFP2 3UTR  | GACACGCCTGCTCATTCG                                | 71 bp.        |
| 931 | 8bQPCRRP2 3UTR  | GTCTCCACCACCATCAACAA                              |               |

932 Primers for aquaporin paralogs were constructed using the following EST's: *aqp8aa(1+2)*: CU071487 and DW573347,  
 933 *aqp8ab*: Ssa.15811 (formerly annotated as AQP-8b), *aqp8b*: ACN11279. \*: Primers previously published (Tipsmark et  
 934 al., 2010). **Bold** marks start and stop codons. *Italic* marks BglIII and EcoRV restriction sites. O(F/R)P: Primers  
 935 annealing outside coding sequence, used for nested PCR. C(F/R)P: Primers used for cloning of the full cDNA sequence.

936

937

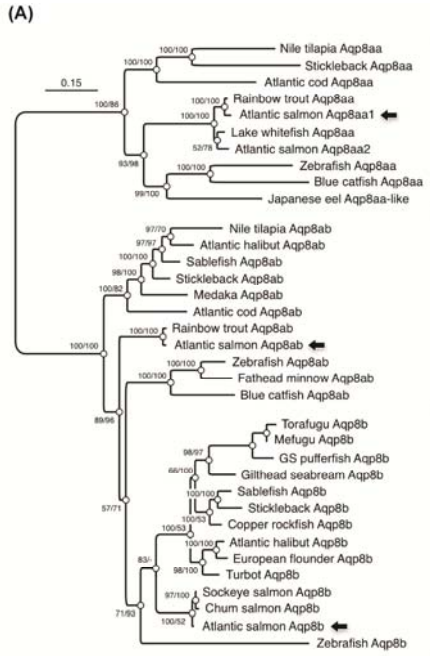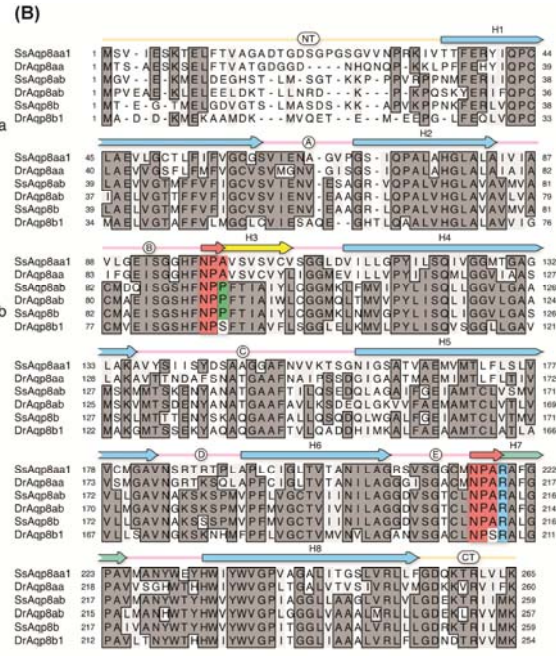

939  
940  
941

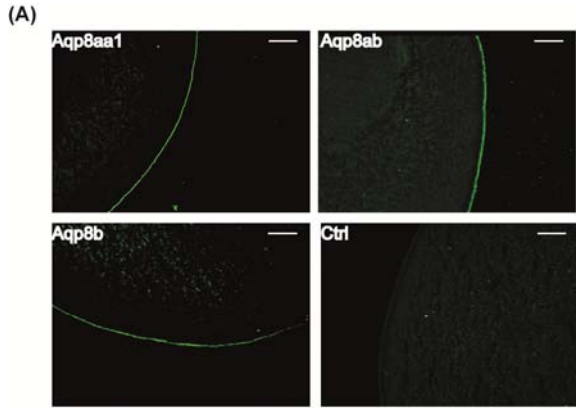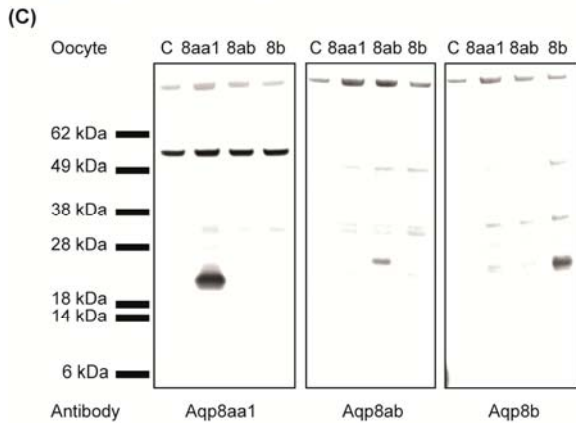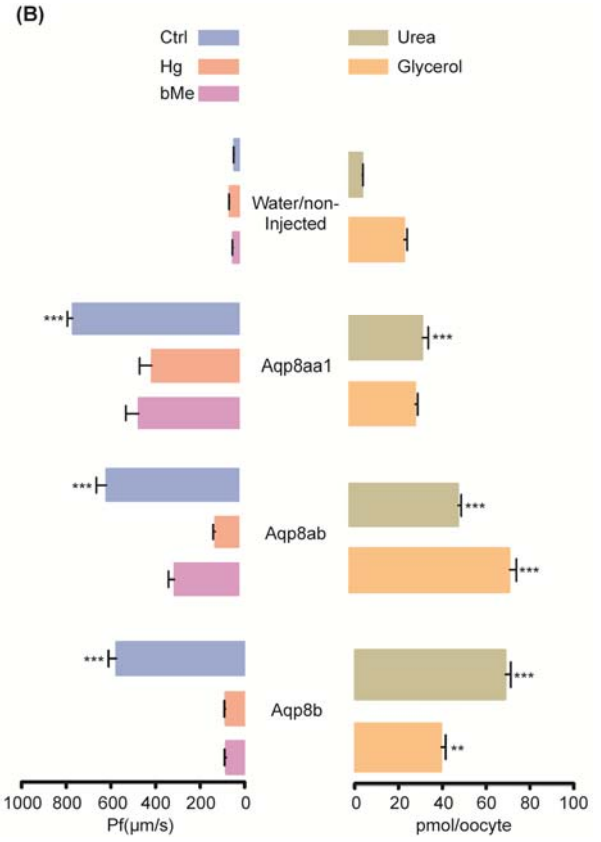

943

944

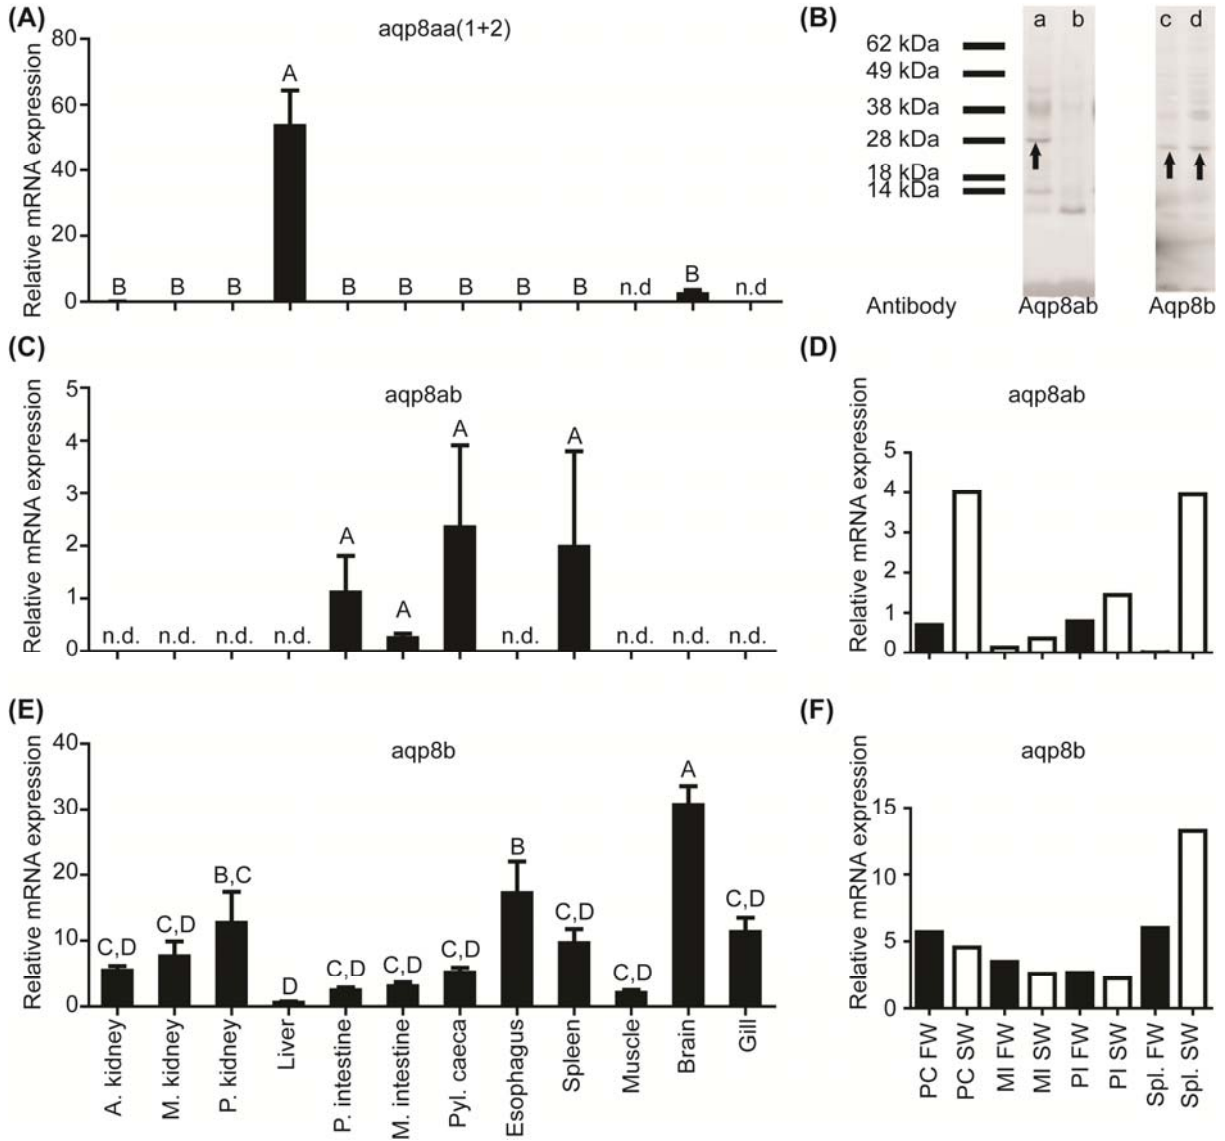

946

947

948

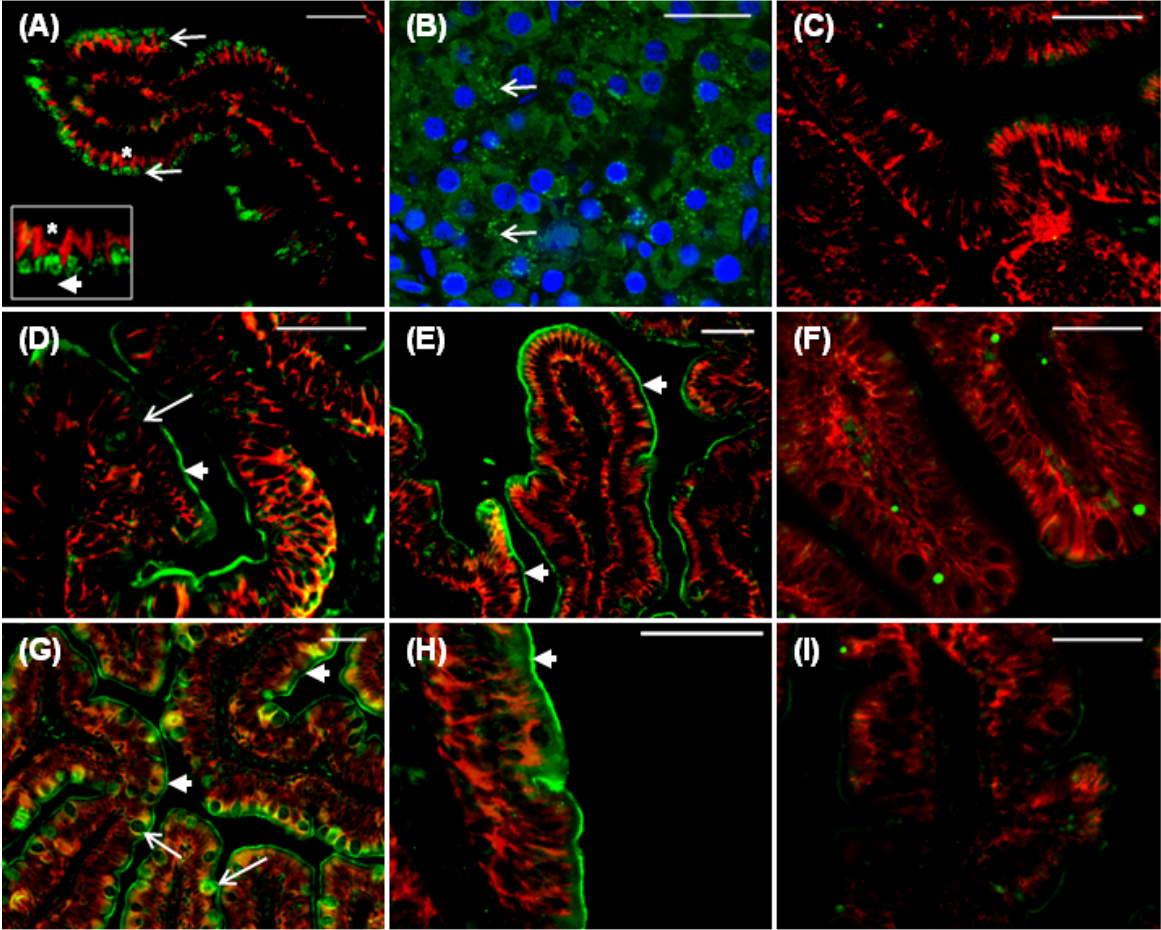



951 Figure 5.

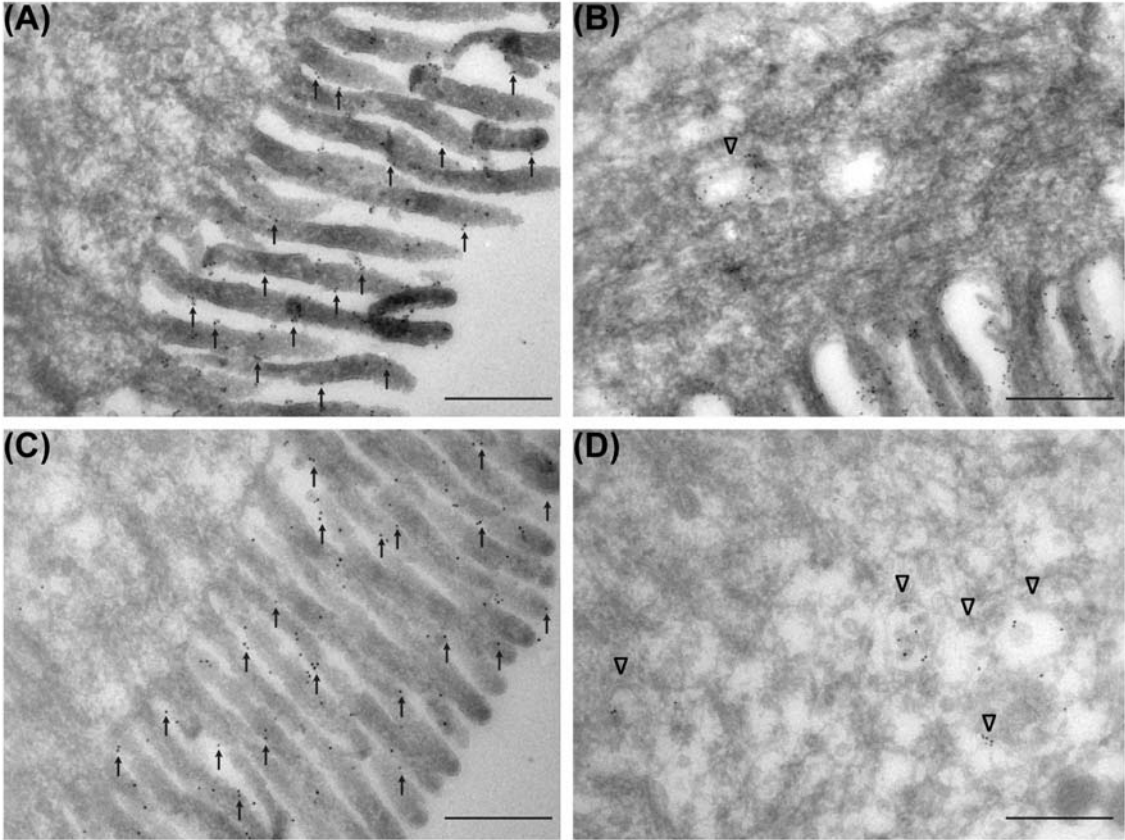

952

953

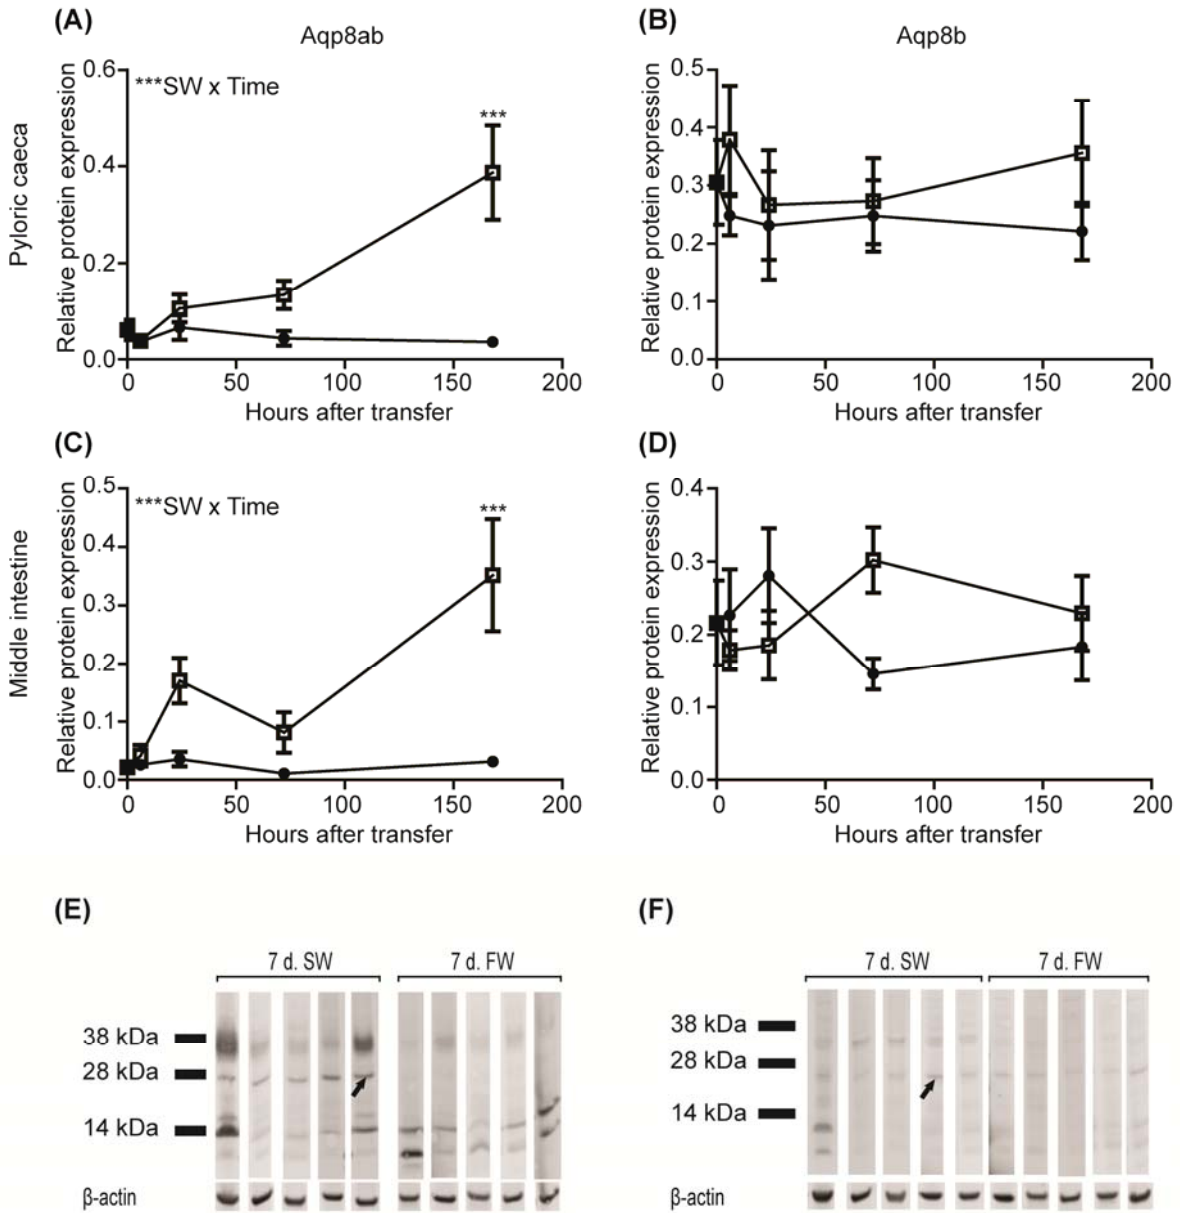

955

956

(A)

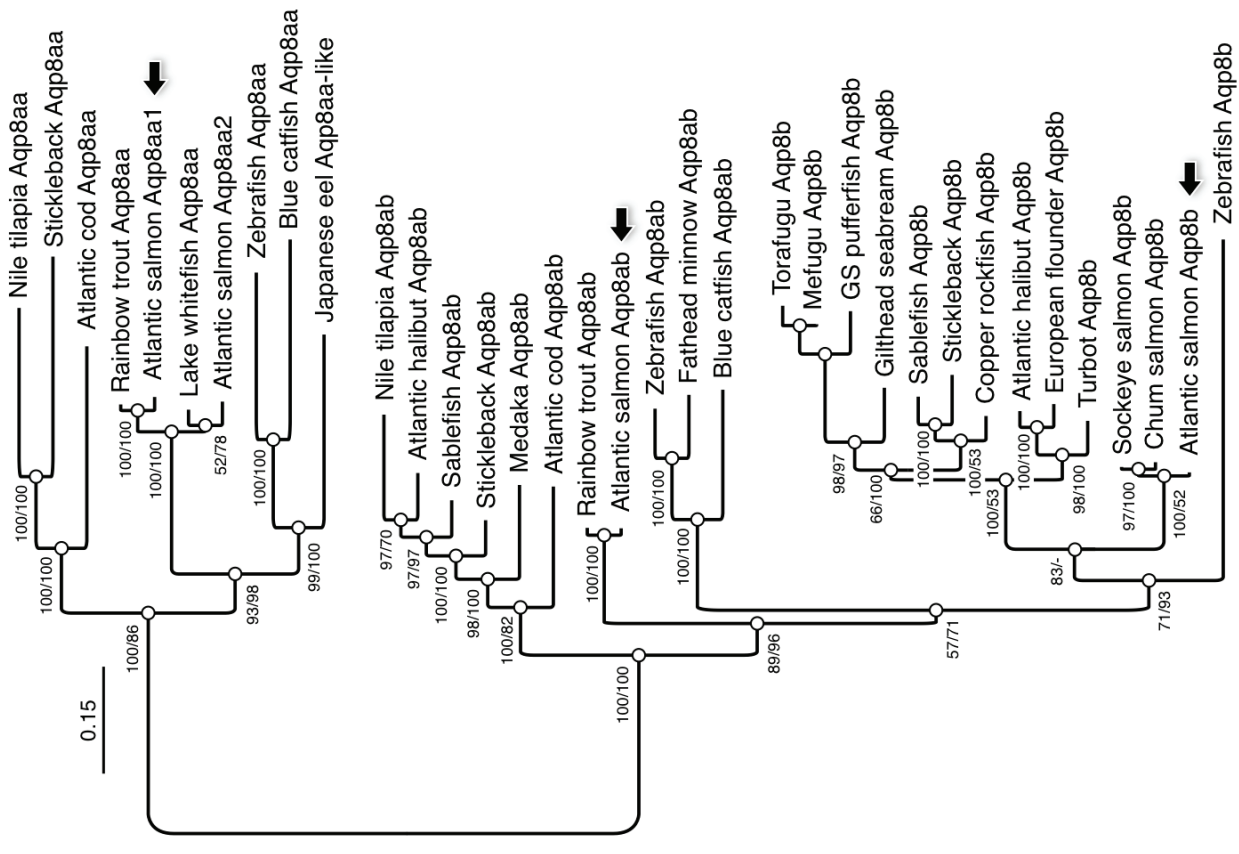

(B)

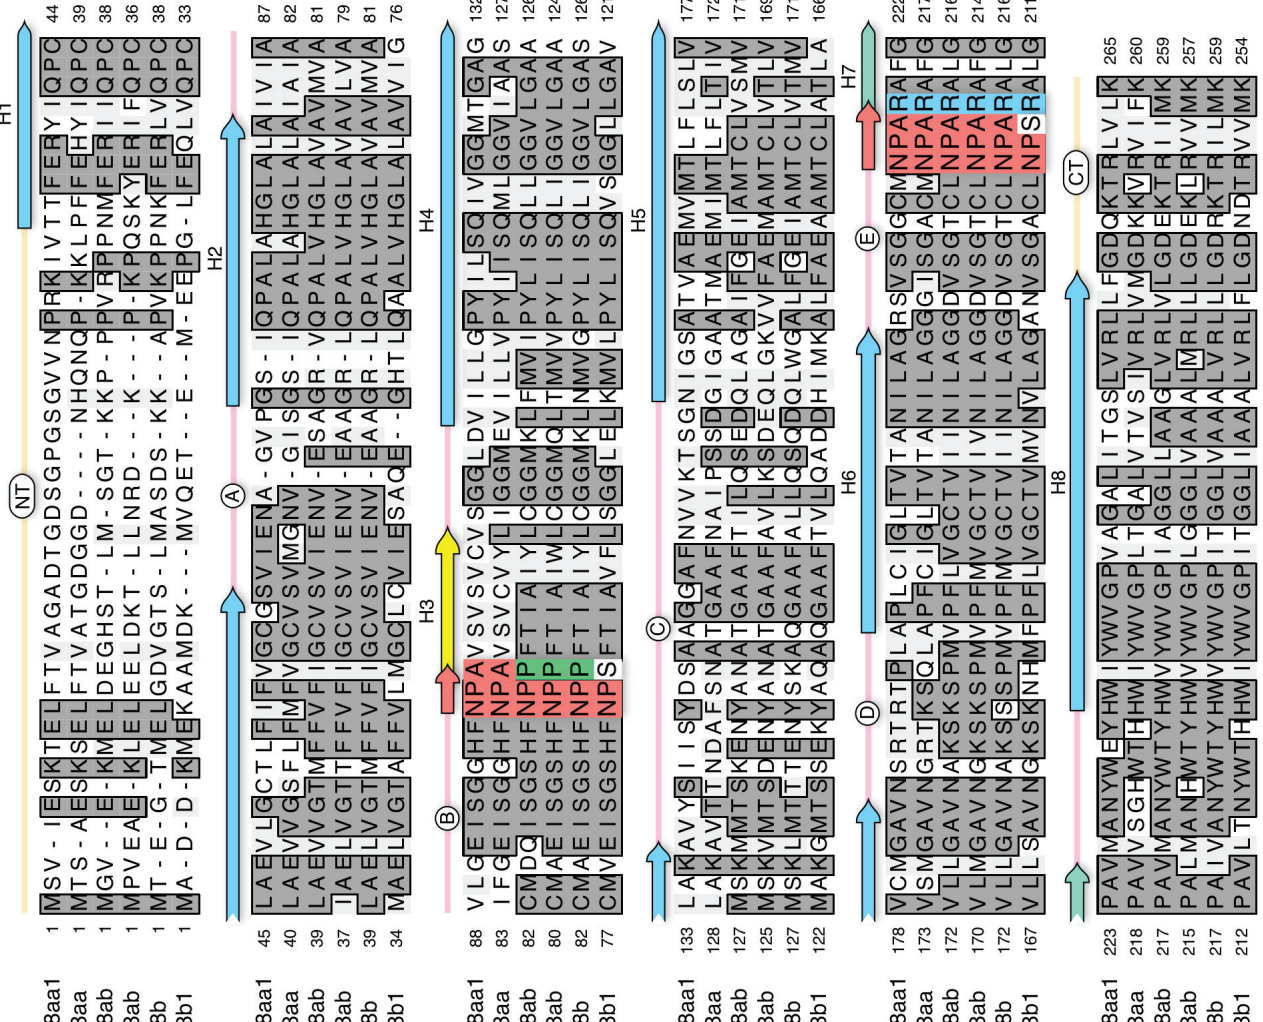

(A)

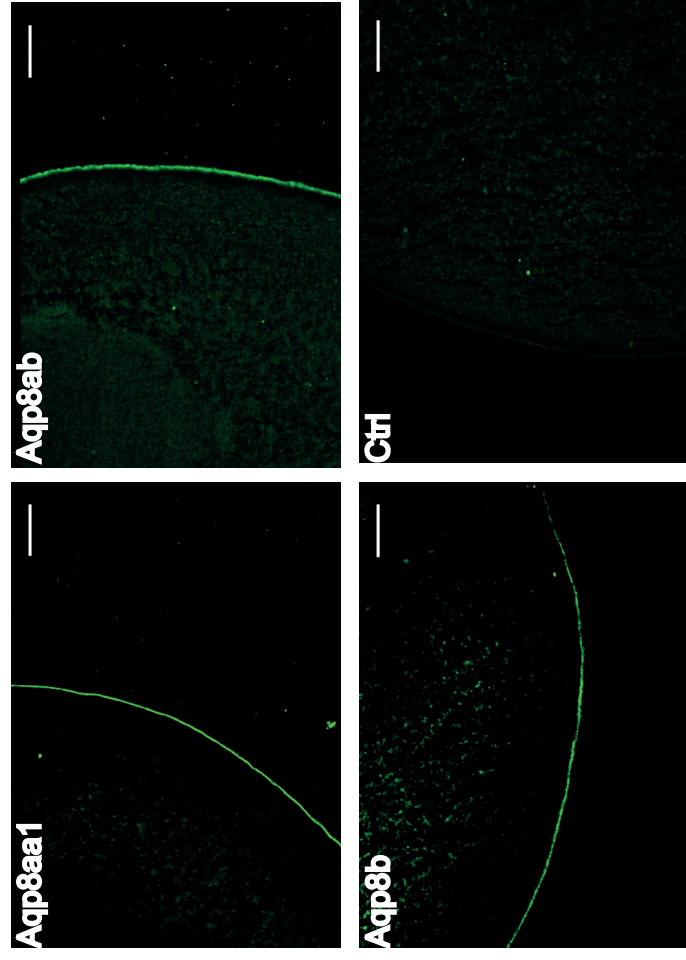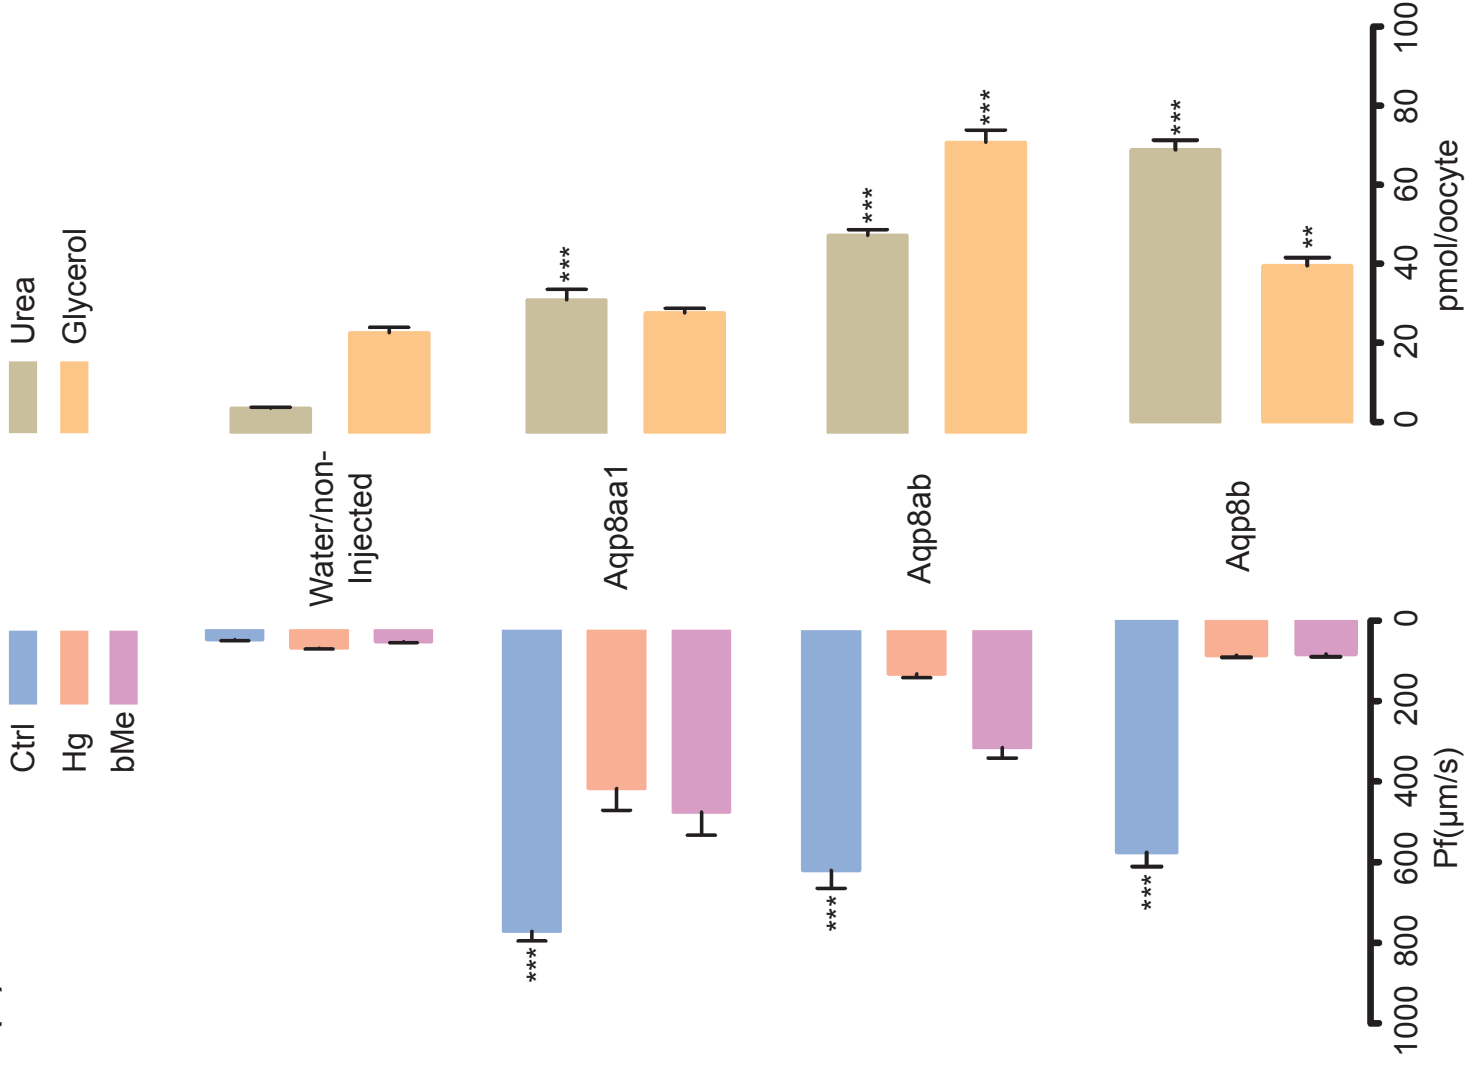

(C)

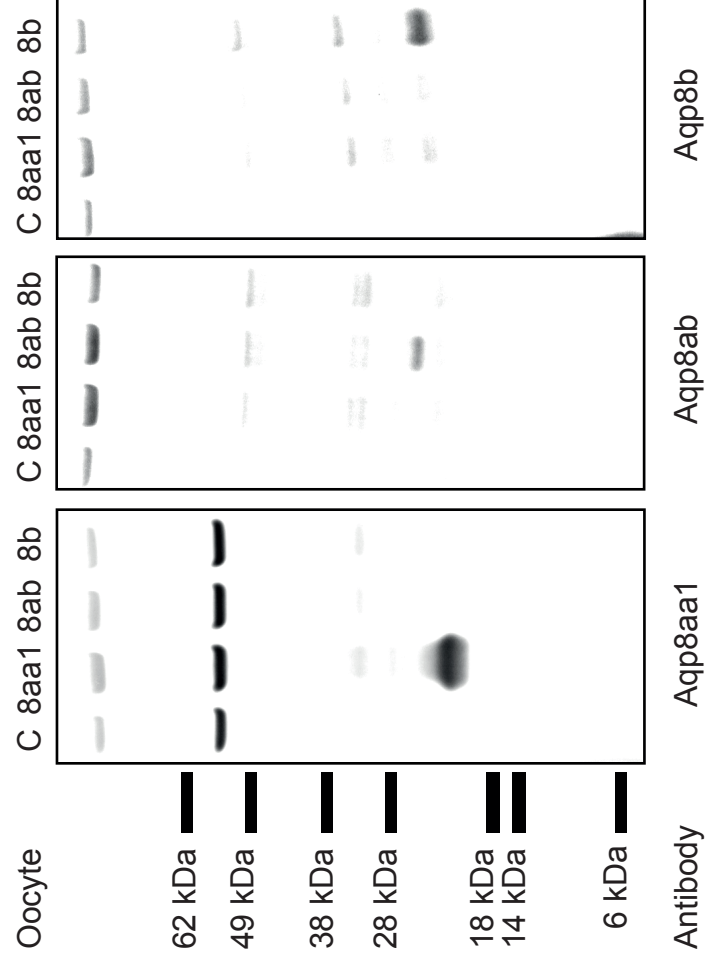

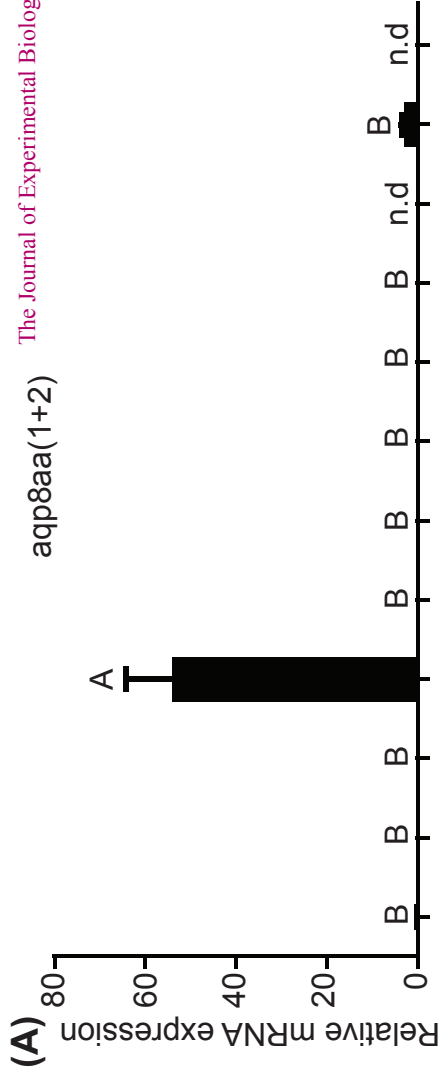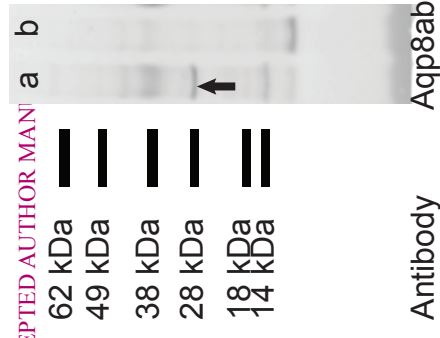

(B) CEPTED AUTHOR MAN

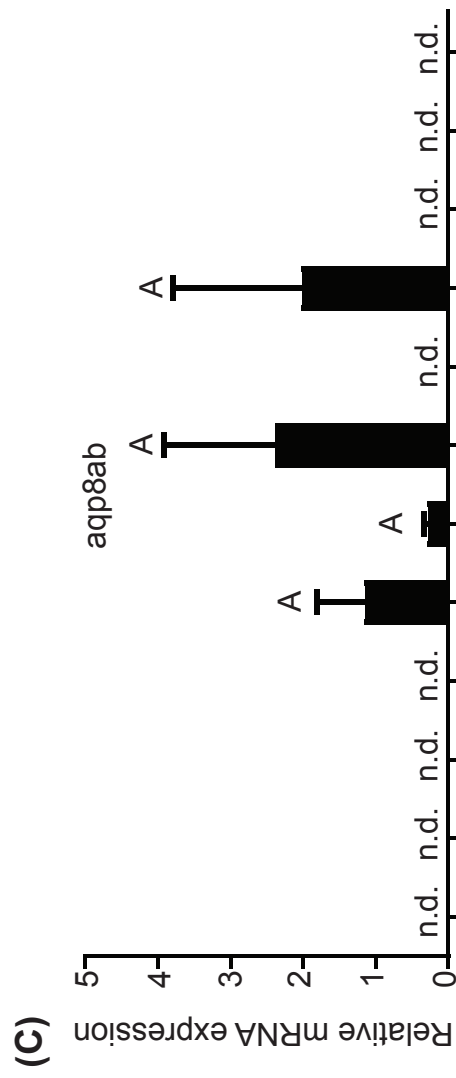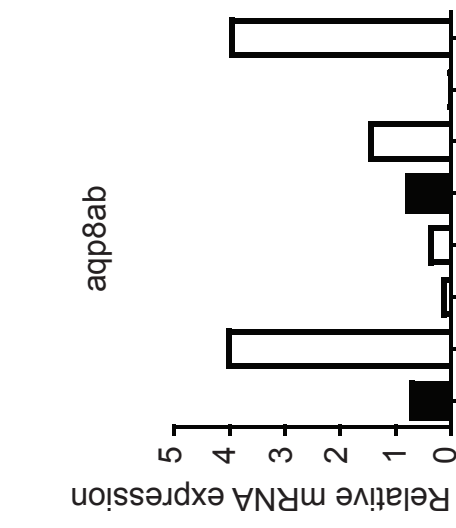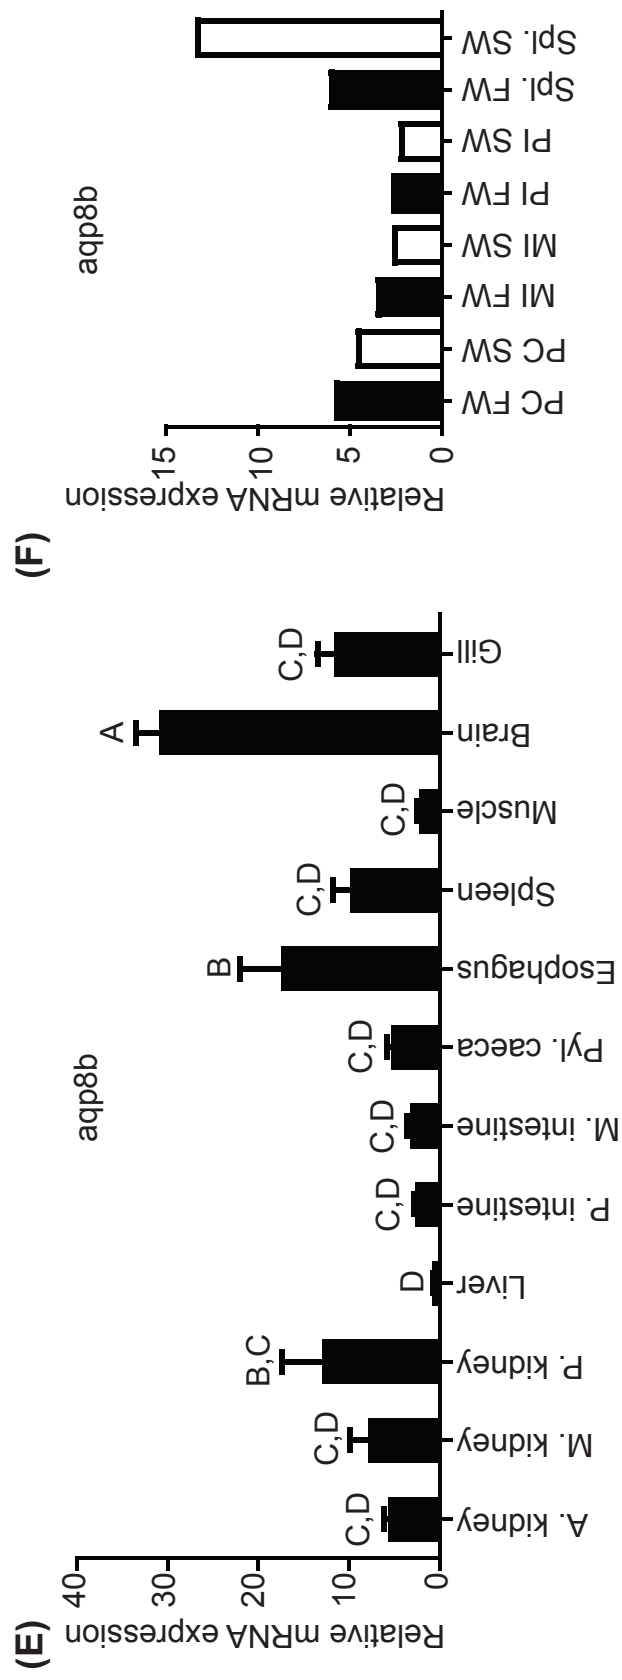



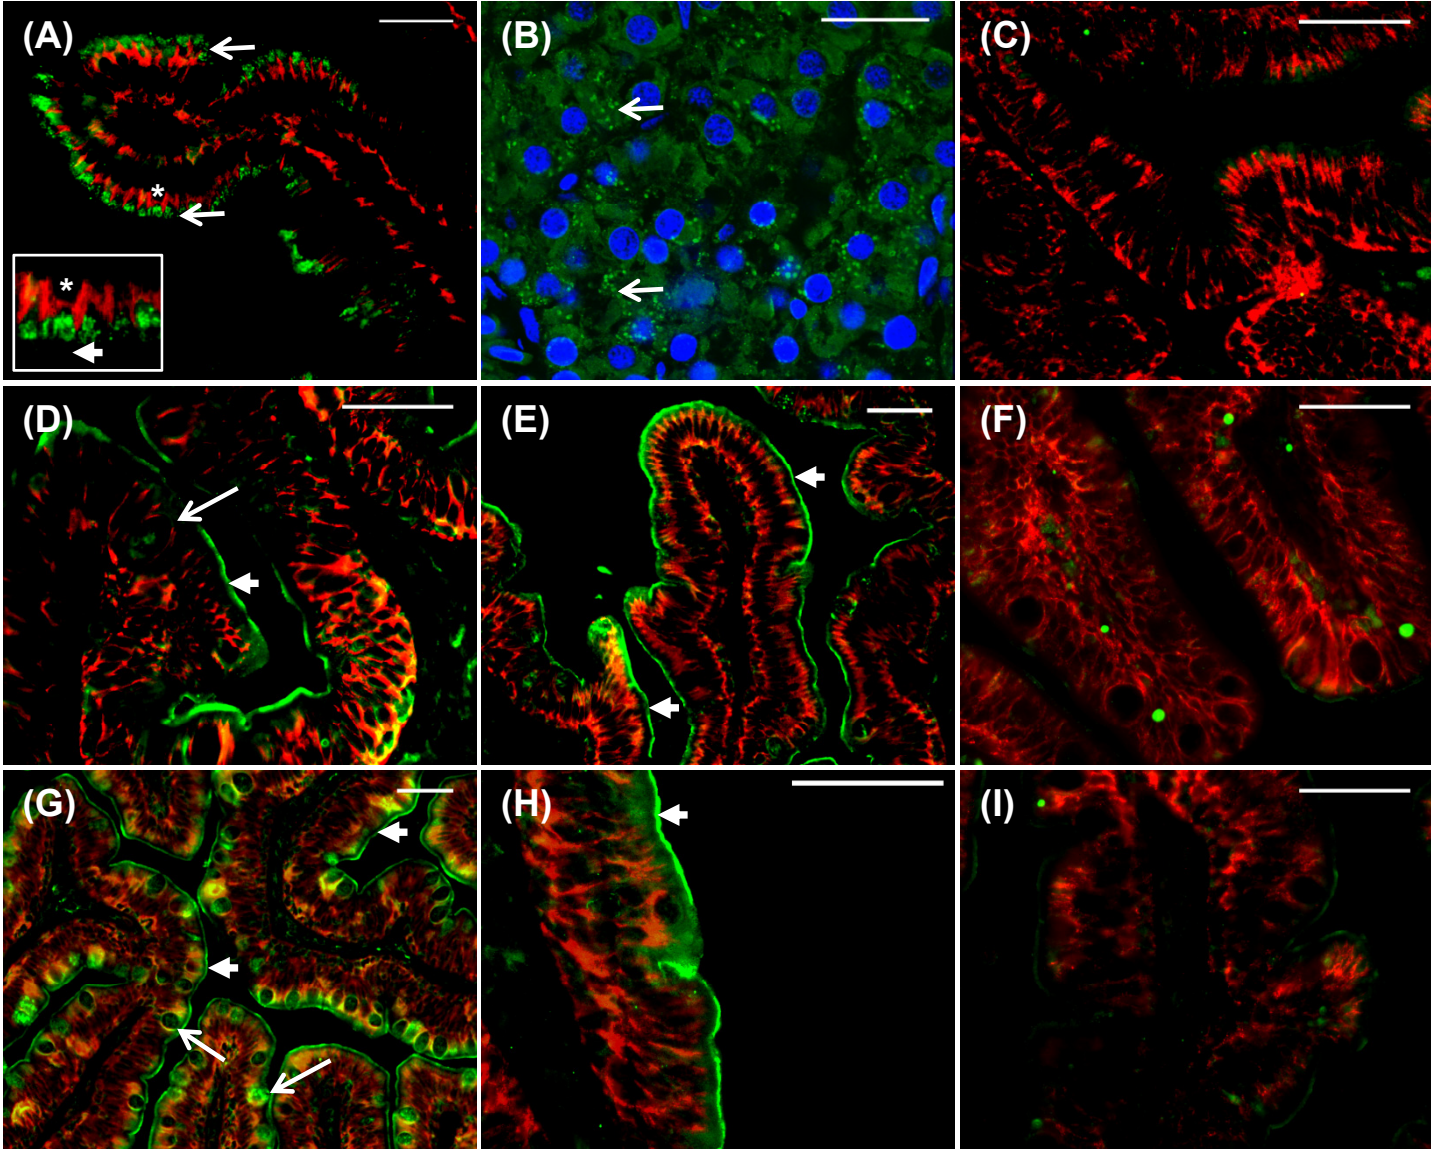

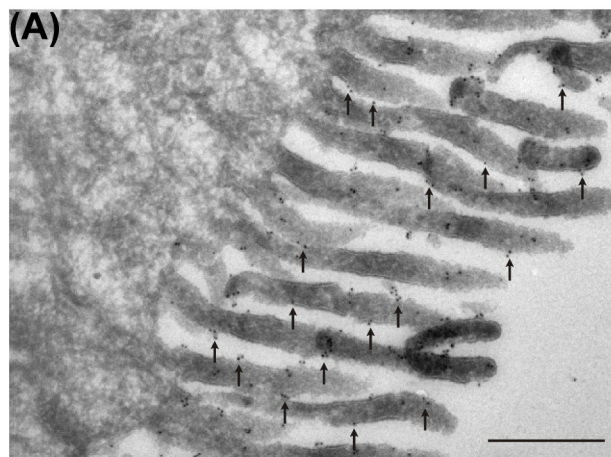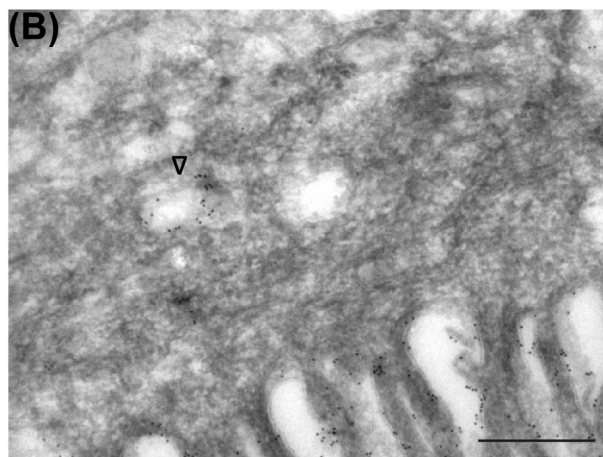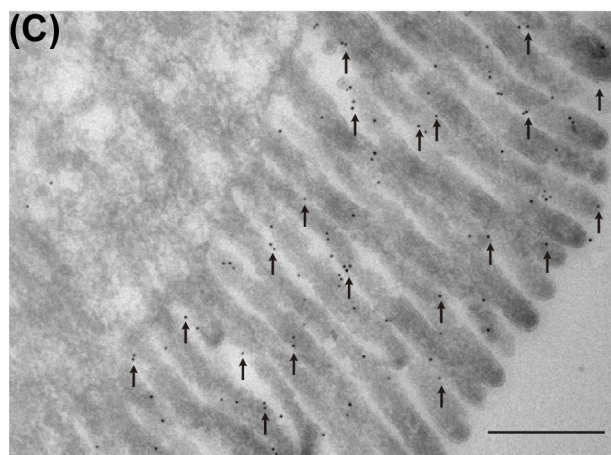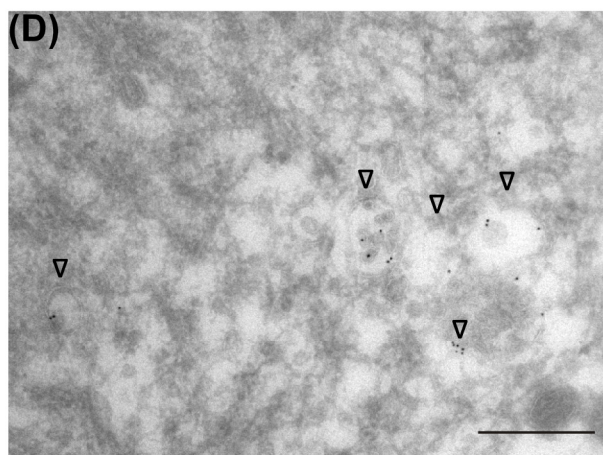



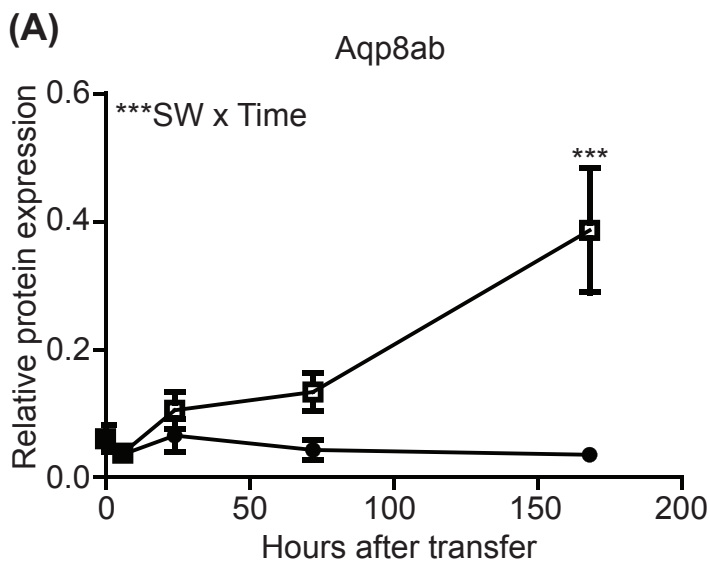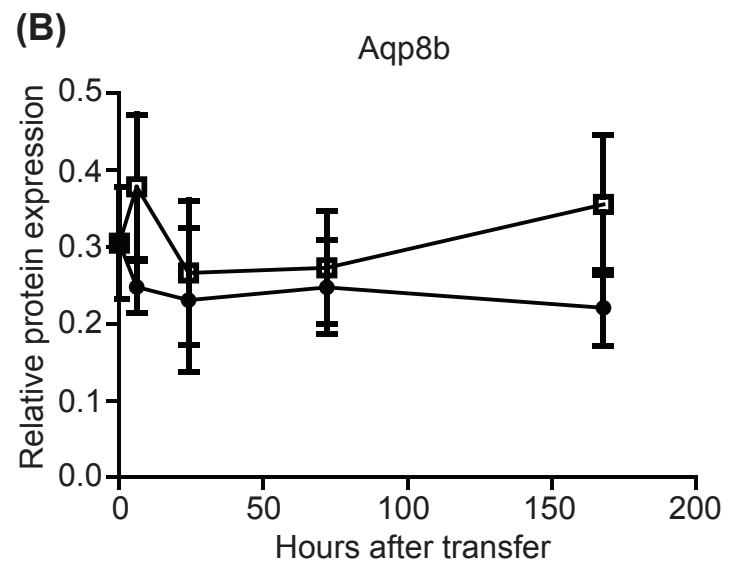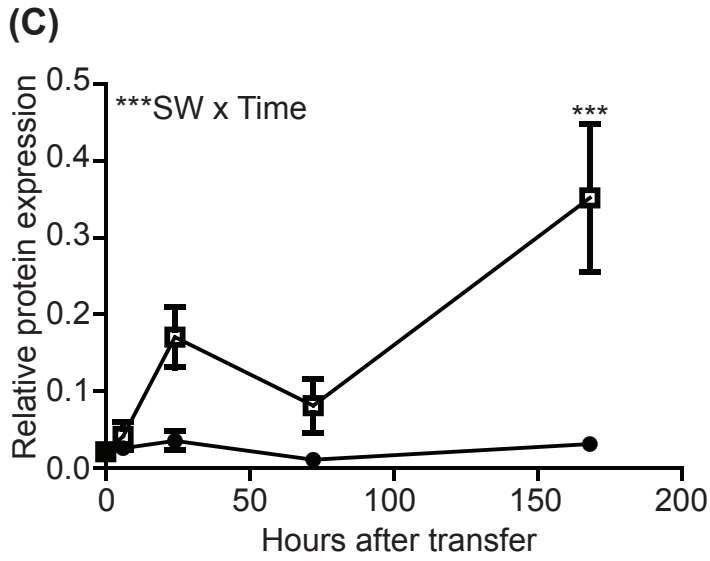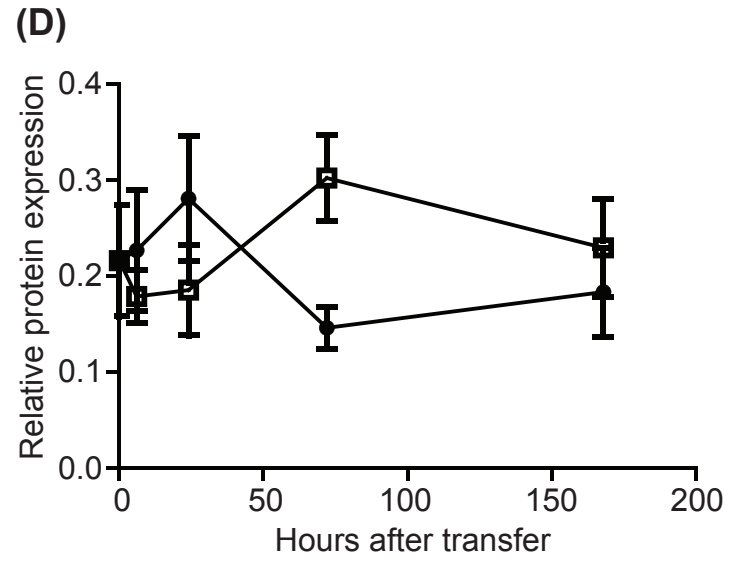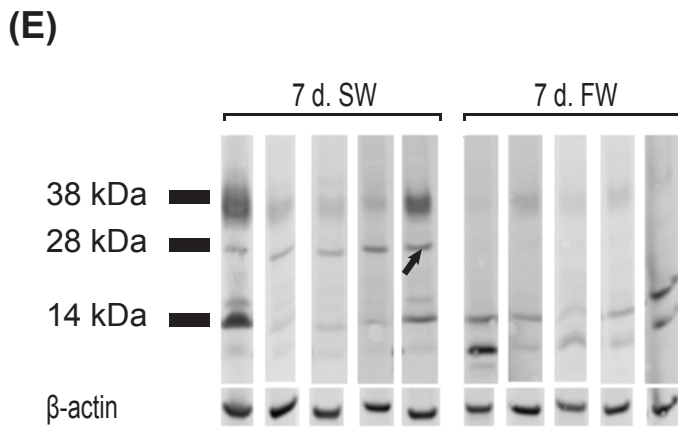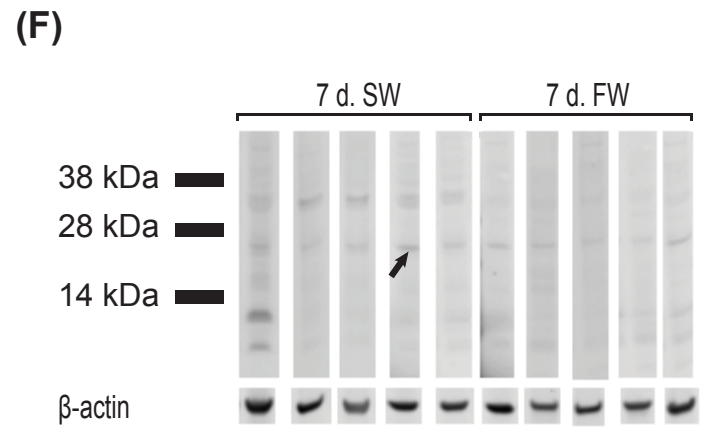

Table 1. Primers used for cloning and QPCR of salmon aquaporin 8 paralogs

| Primer          | Primer sequence 5'→3'                             | Amplicon size |
|-----------------|---------------------------------------------------|---------------|
| 8aa1OFP         | GTAAGTGACACAGAGAGCAGCAGTA                         | 832 bp.       |
| 8aa1ORP         | GTAAGTGACACAGAGAGCAGCAGTA                         |               |
| 8aa1CFP         | <i>ACTAGATCTAT</i> <b>GT</b> CTGTGATAGAGTCAAAGAC  | 816 bp.       |
| 8aa1CRP         | <i>AGCGATATCTT</i> <b>ACTT</b> CAGAACAAGACGTGTCT  |               |
| 8abCFP          | <i>ACTAGATCTAT</i> <b>G</b> GGAGTTGAGAAAATGGAGCT  | 798 bp.       |
| 8abCRP          | <i>CGCGATATCTC</i> <b>ACTT</b> CATGATGATTCGTGTCTT |               |
| 8bbOFP          | TCTCTCCAAACTCCTTTCCA                              | 858 bp.       |
| 8bbORP          | TGGCACTGCATGTAACAACA                              |               |
| 8bbCFP          | <i>ACTAGATCTAT</i> <b>G</b> ACAGAAGGGACAATGGAAC   | 798 bp.       |
| 8bbCRP          | <i>CGCGATATCTT</i> <b>ACTT</b> CATGAGAATACGTGTCTT |               |
| 8aa(1+2)QPCRFP* | TCATGACCCTCTTCCTGTCC                              | 145 bp.       |
| 8aa(1+2)QPCRRP* | GGGTTTCATACACCCTCCAGA                             |               |
| 8abQPCRFP*      | GGAGCTGCCATGTCAAAGAT                              | 159 bp.       |
| 8abQPCRRP*      | CGCCCCTAGCAATACTACCA                              |               |
| 8bQPCRFP2 3UTR  | GACACGCCTGCTCATTCCG                               | 71 bp.        |
| 8bQPCRRP2 3UTR  | GTCTCCACCACCATCAACAA                              |               |

Primers for aquaporin paralogs were constructed using the following EST's: *aqp8aa(1+2)*: CU071487 and DW573347, *aqp8ab*: Ssa.15811 (formerly annotated as AQP-8b), *aqp8b*: ACN11279. \*: Primers previously published (Tipsmark et al., 2010). **Bold** marks start and stop codons. *Italic* marks BglIII and EcoRV restriction sites. O(F/R)P: Primers annealing outside coding sequence, used for nested PCR. C(F/R)P: Primers used for cloning of the full cDNA sequence.
